# Supplementary material for: Multifunctional Derivatives of Spiropyrrolidine Tethered Indeno-Quinoxaline Heterocyclic Hybrids as Potent Antimicrobial, Antioxidant and Antidiabetic Agents: Design, Synthesis, In Vitro and In Silico Approaches
Source: MDPI journal article supplement (doi:10.3390/molecules27217248), 2022-10-25
Supplement: s1 [file s1]

## **Supplementary Information**

**Design and synthesis of novel class of spiropyrrolidine tethered indeno–quinoxaline heterocyclic hybrids as potent antimicrobial, antioxidant and antidiabetic agents. *In Vitro* and In Silico Studies**

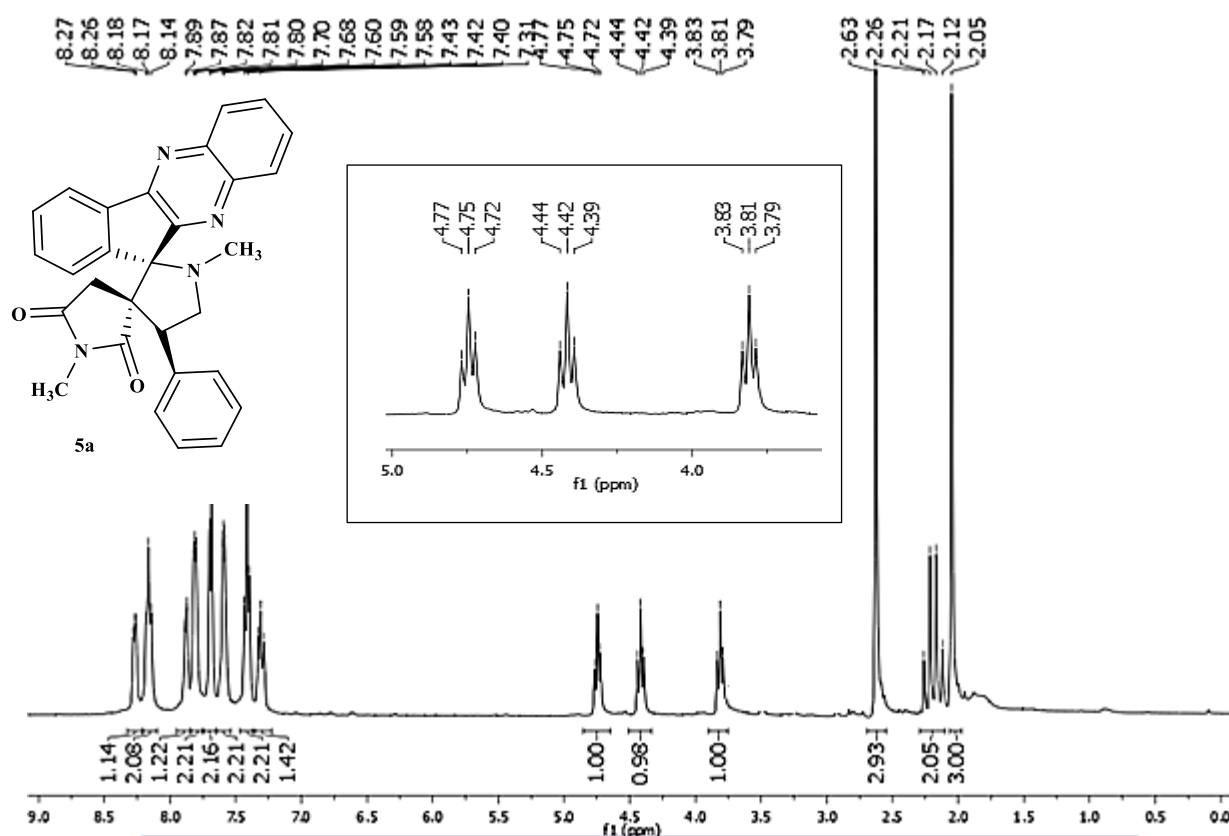

Figure S1. <sup>1</sup>H NMR (CDCl<sub>3</sub>) spectrum of Compound (5a)

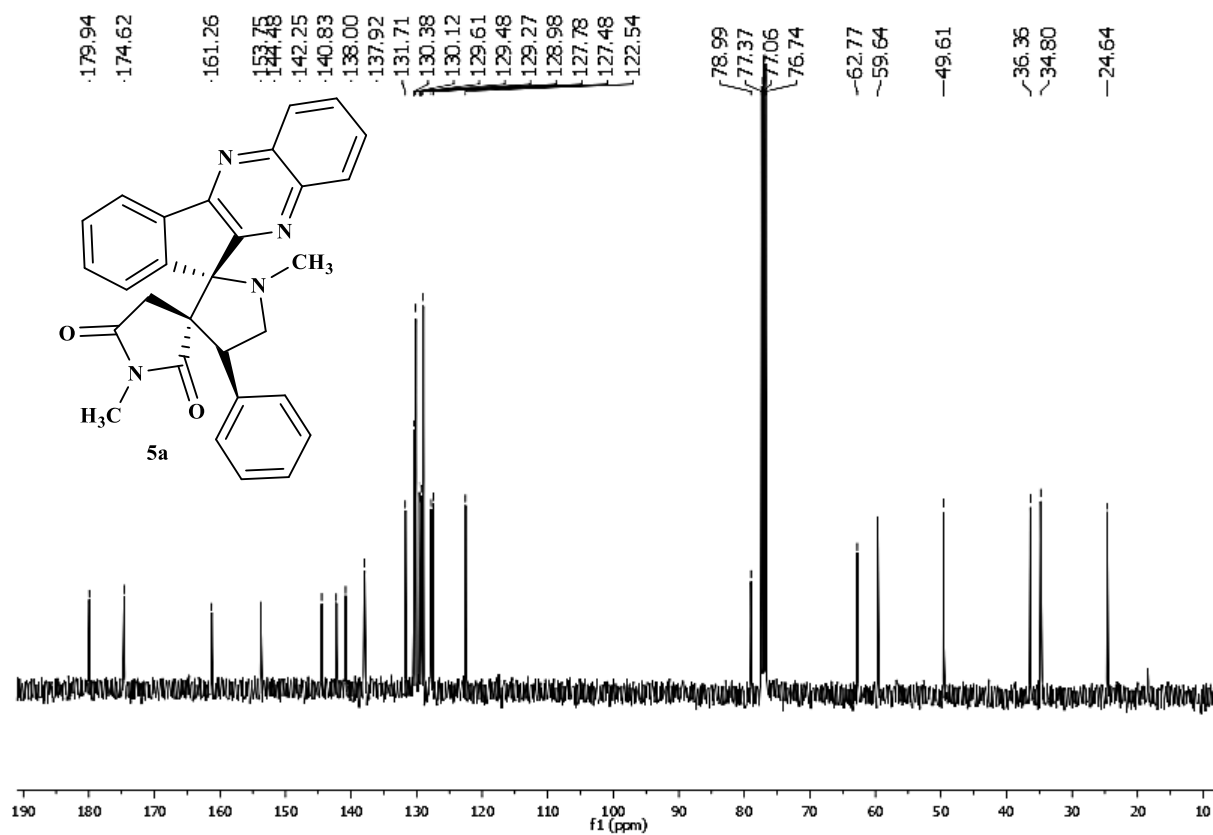

Figure S2. <sup>13</sup>C NMR (CDCl<sub>3</sub>) spectrum of Compound (5a)

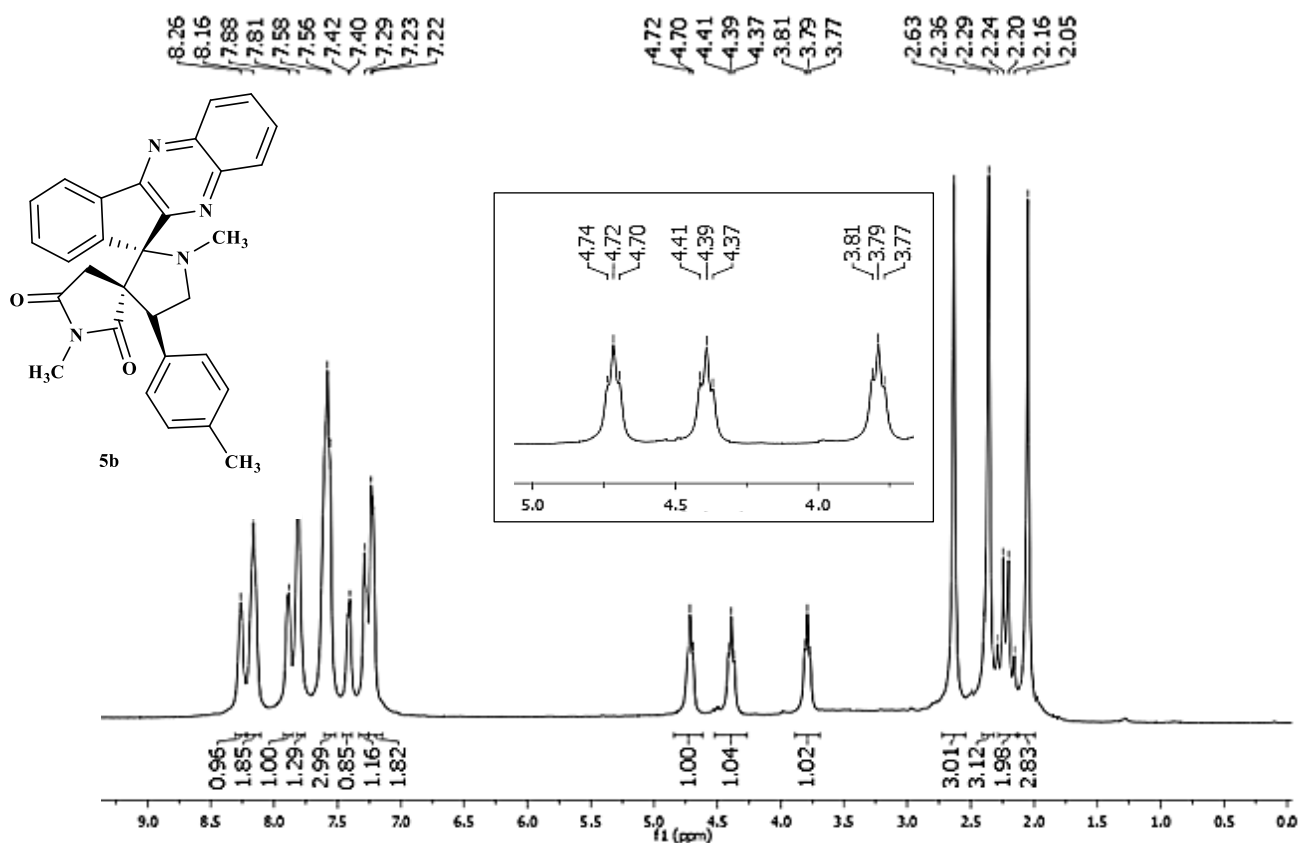

Figure S3. <sup>1</sup>H NMR (CDCl<sub>3</sub>) spectrum of Compound (5b)

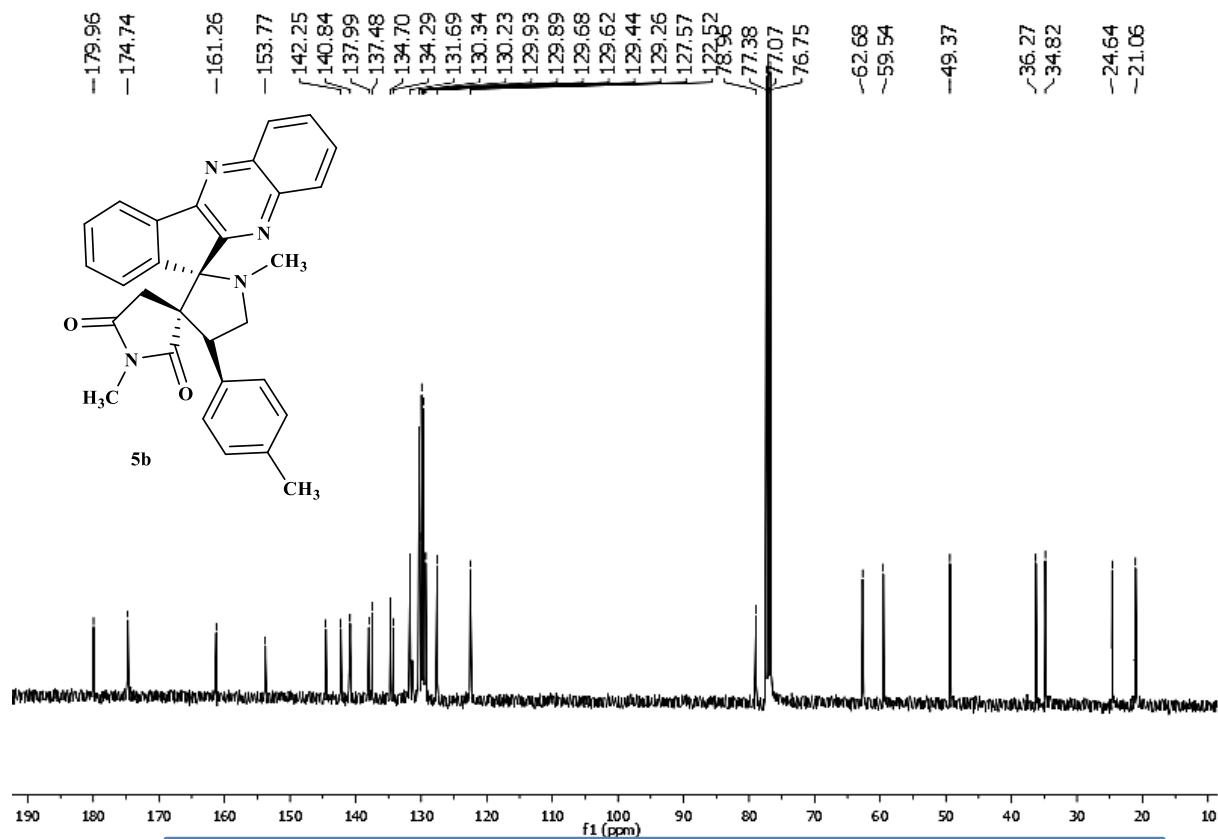

Figure S4. <sup>13</sup>C NMR (CDCl<sub>3</sub>) spectrum of Compound (5b)

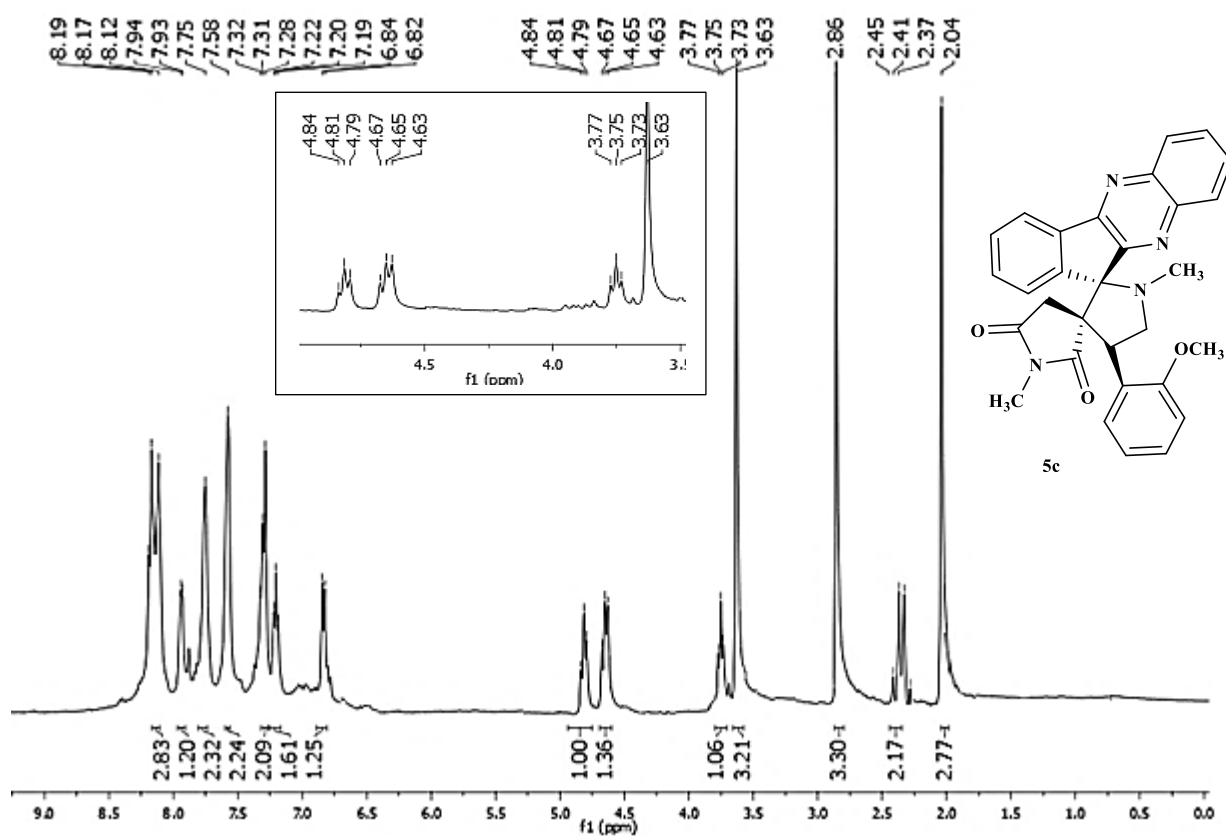

Figure S5. <sup>1</sup>H NMR (CDCl<sub>3</sub>) spectrum of Compound (5c)

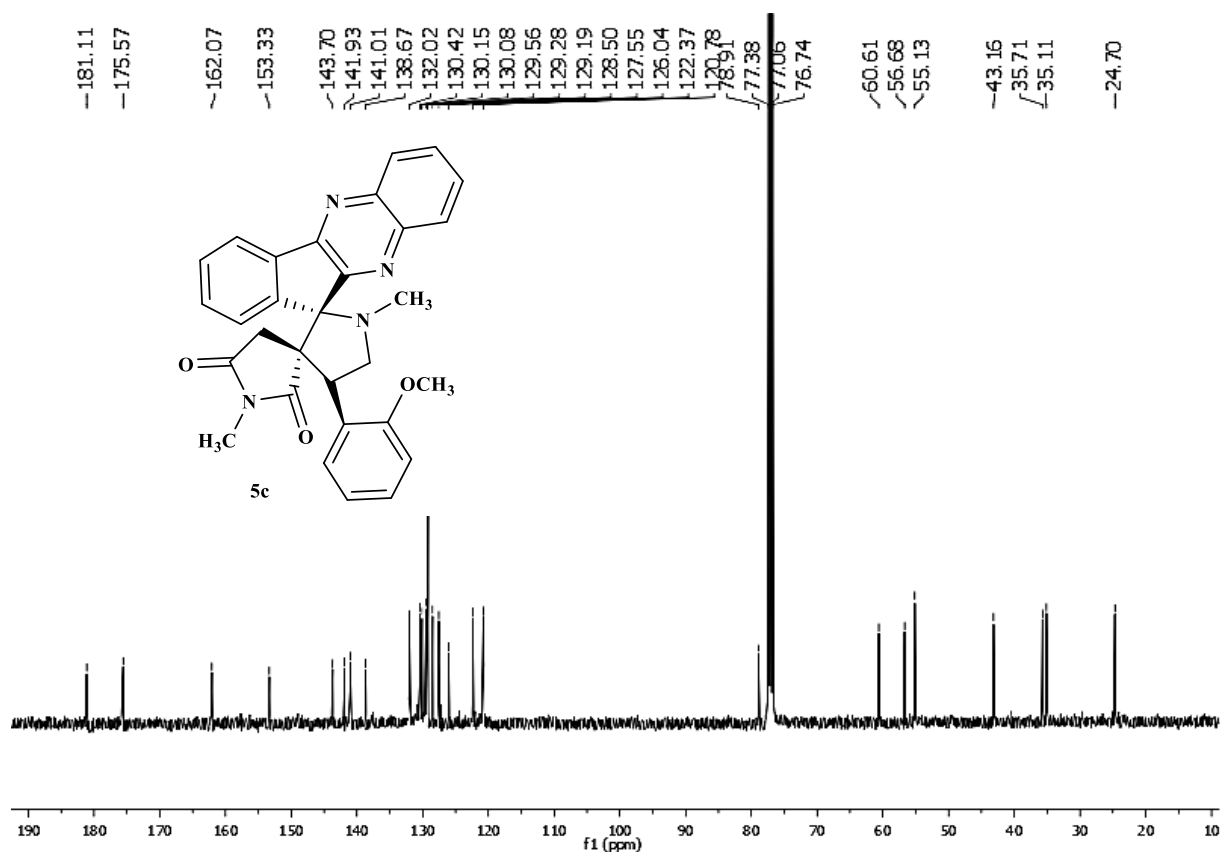

Figure S6. <sup>13</sup>C NMR (CDCl<sub>3</sub>) spectrum of Compound (5c)

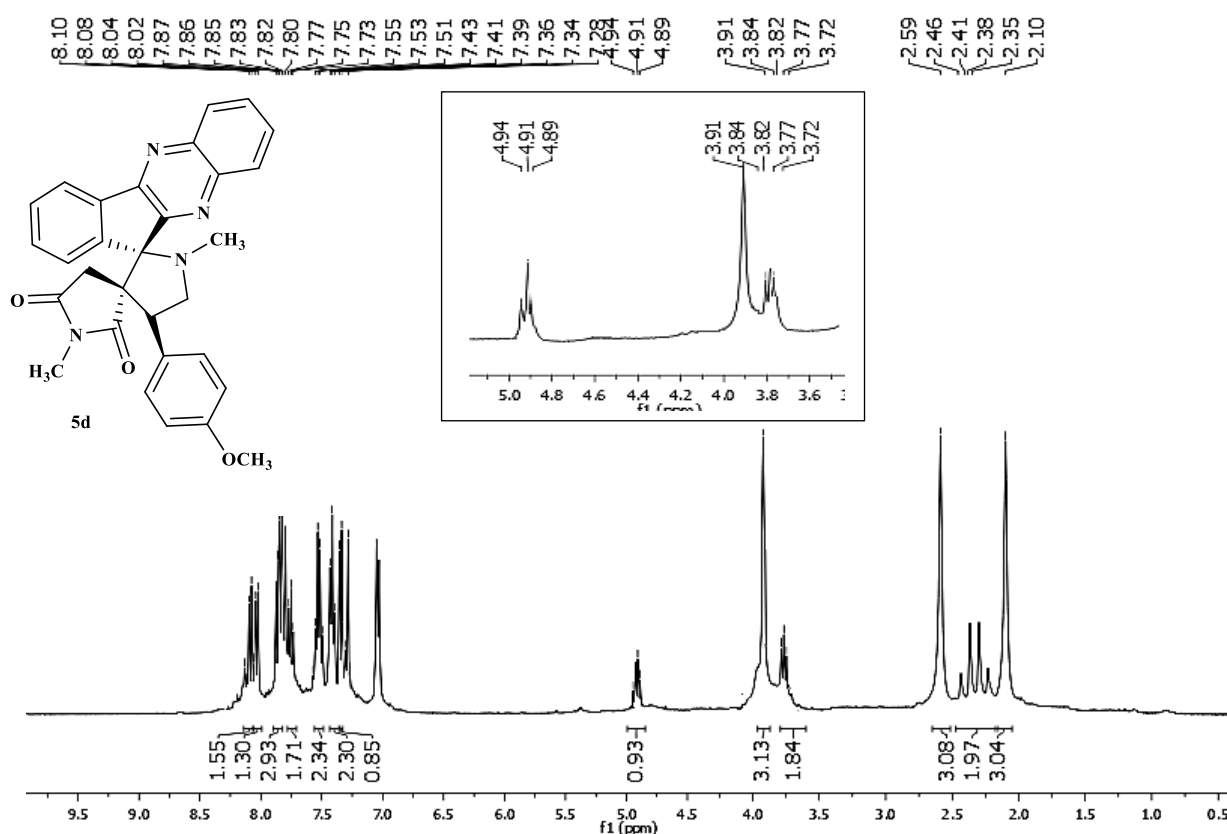

Figure S7. <sup>1</sup>H NMR (CDCl<sub>3</sub>) spectrum of Compound (5d)

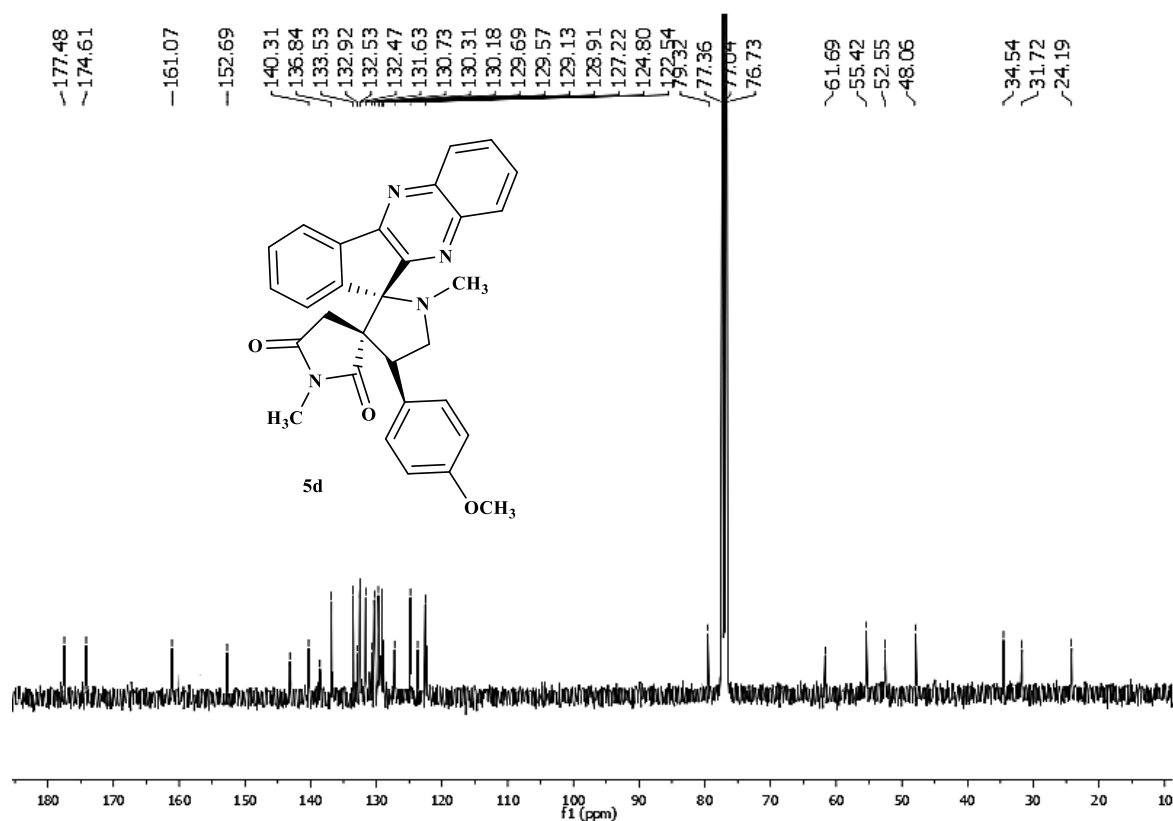

Figure S8. <sup>13</sup>C NMR (CDCl<sub>3</sub>) spectrum of Compound (5d)

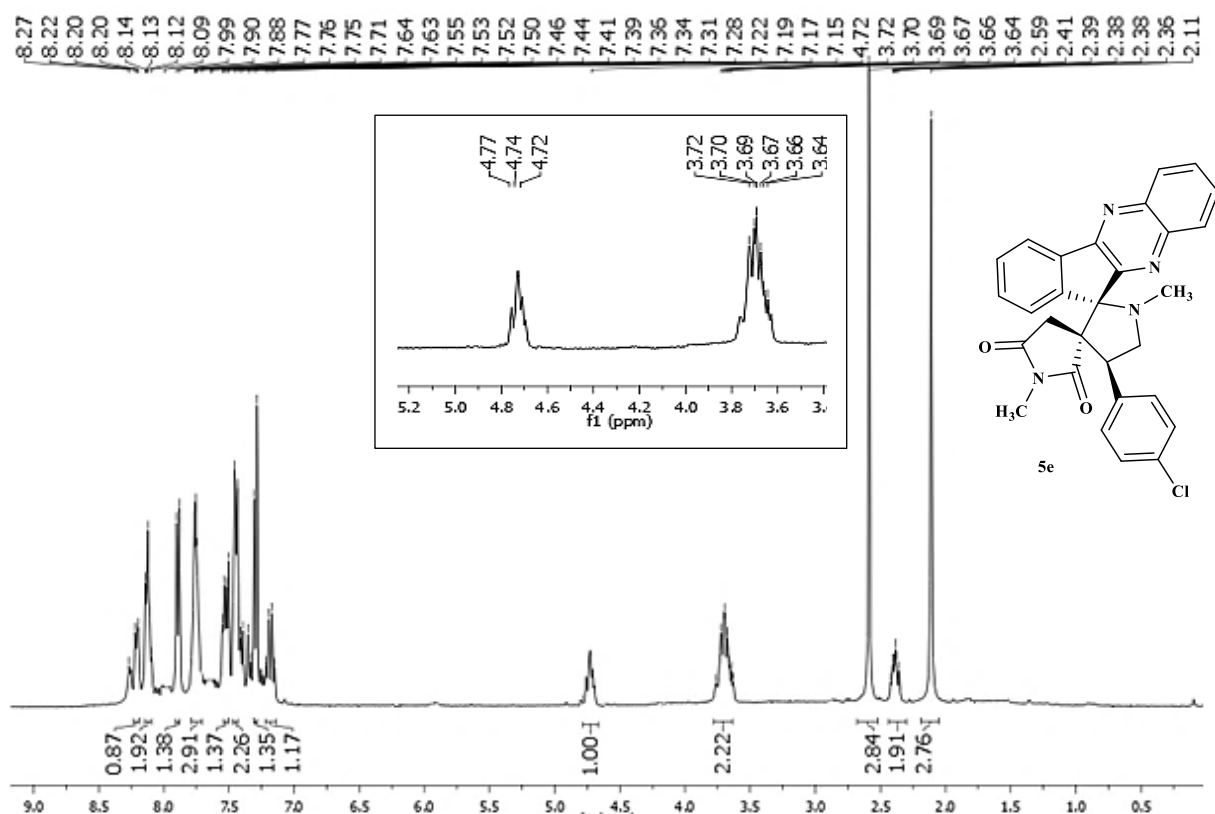

Figure S9. <sup>1</sup>H NMR (CDCl<sub>3</sub>) spectrum of Compound (5e)

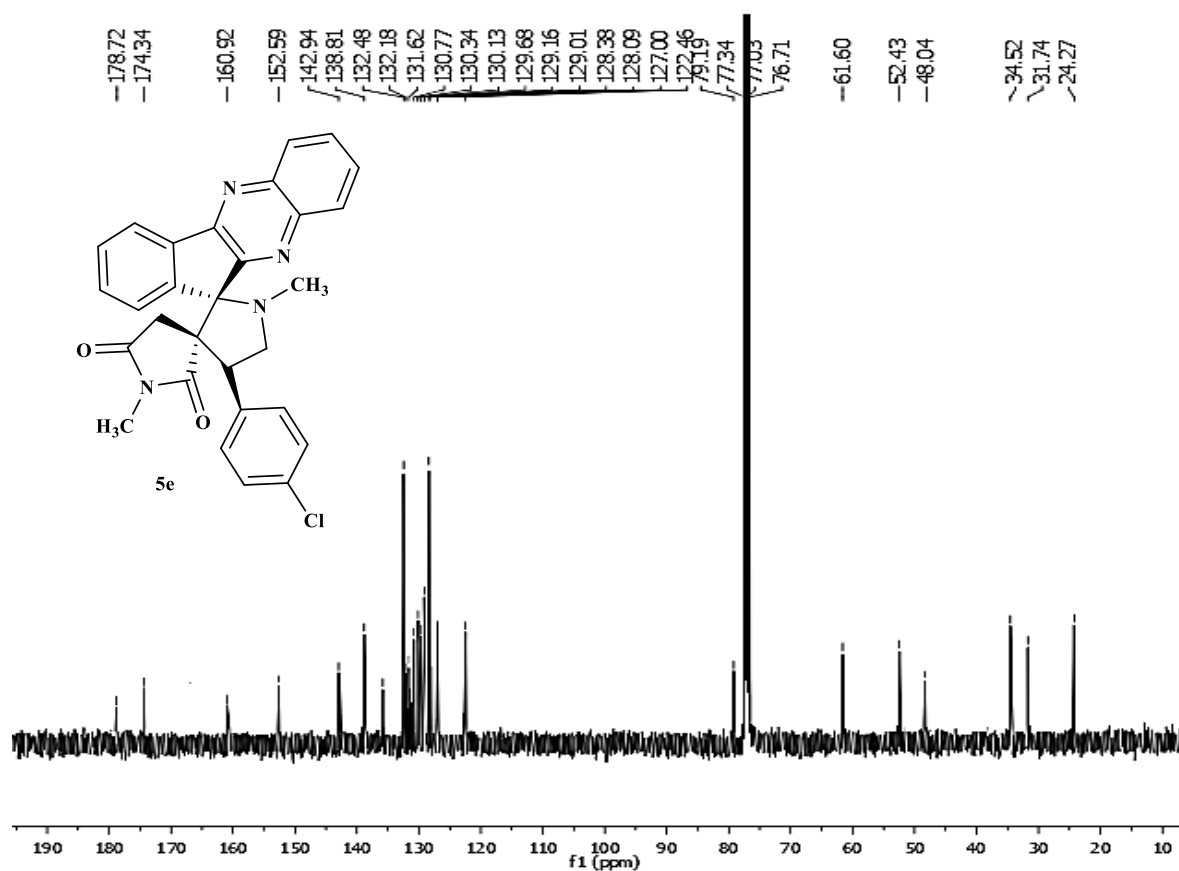

Figure S10. <sup>13</sup>C NMR (CDCl<sub>3</sub>) spectrum of Compound (5e)

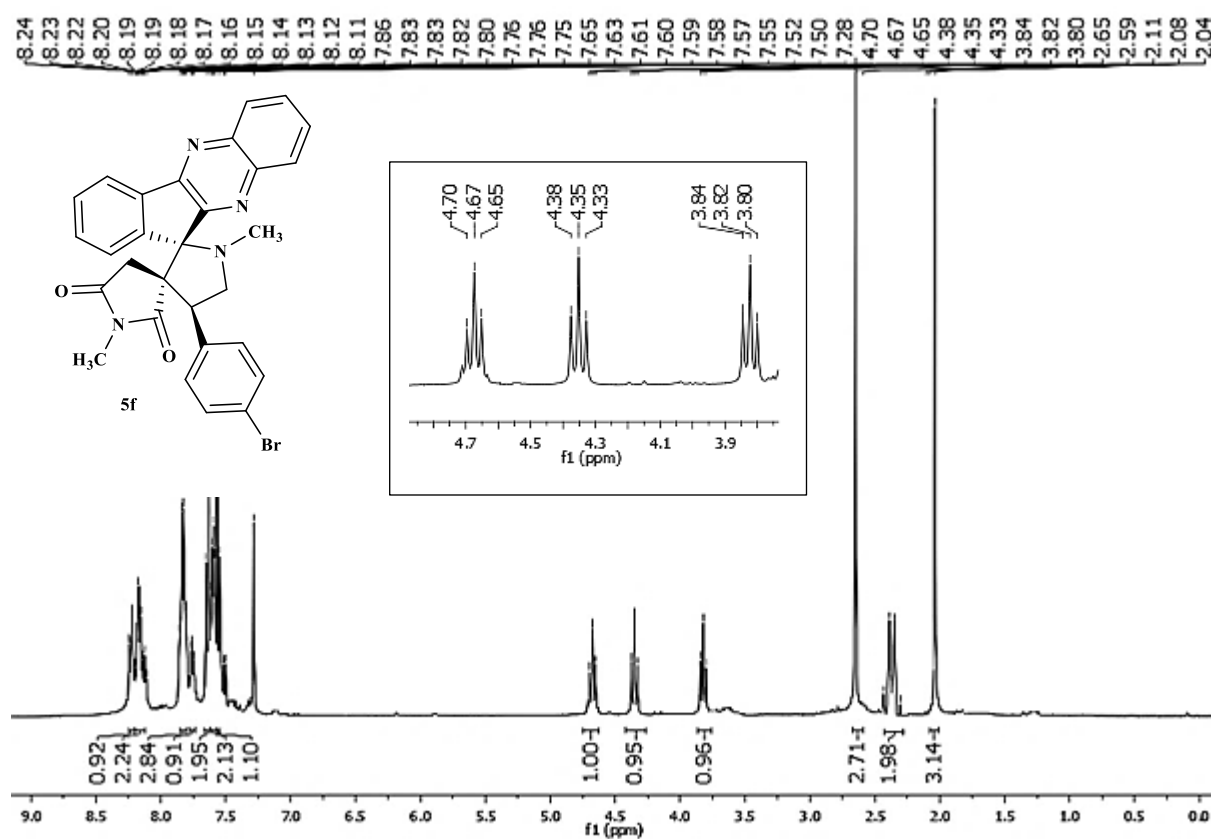

Figure S11. <sup>1</sup>H NMR (CDCl<sub>3</sub>) spectrum of Compound (5f)

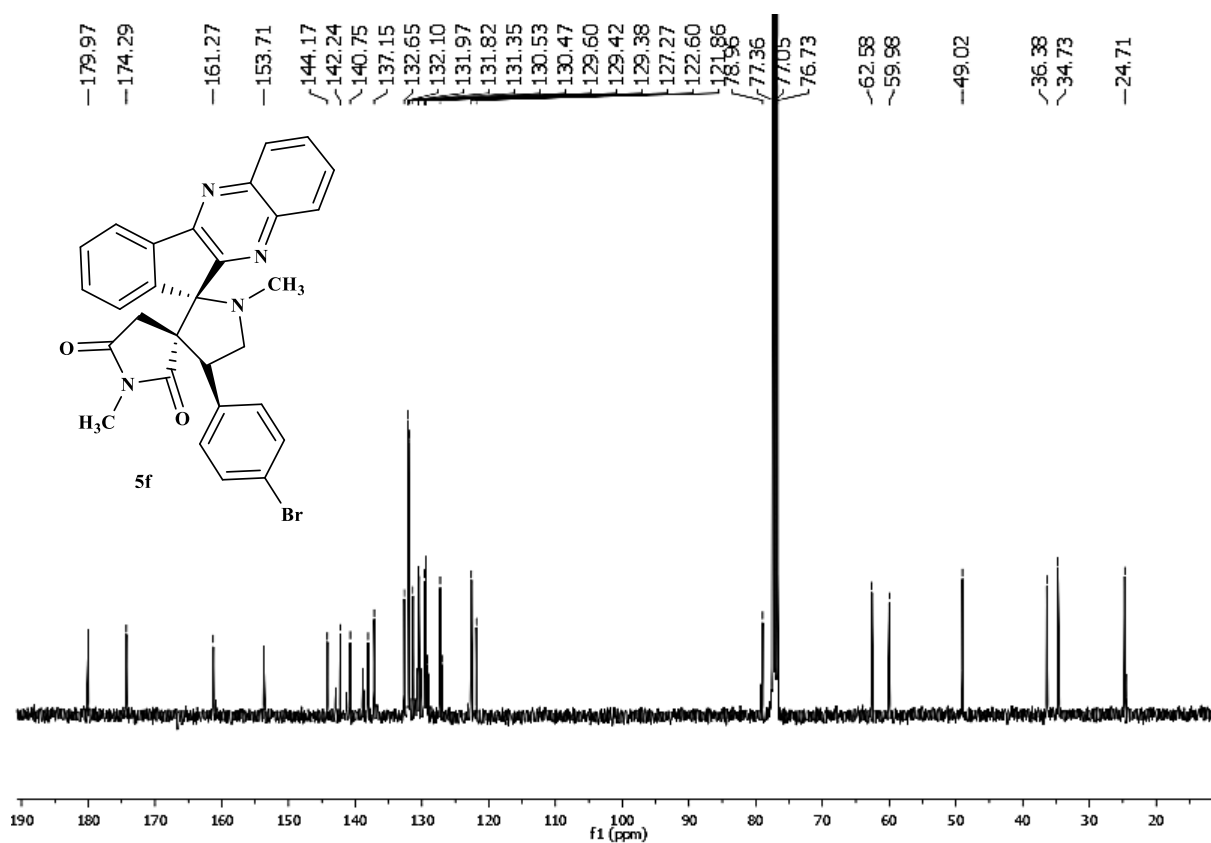

Figure S12. <sup>13</sup>C NMR (CDCl<sub>3</sub>) spectrum of Compound (5f)

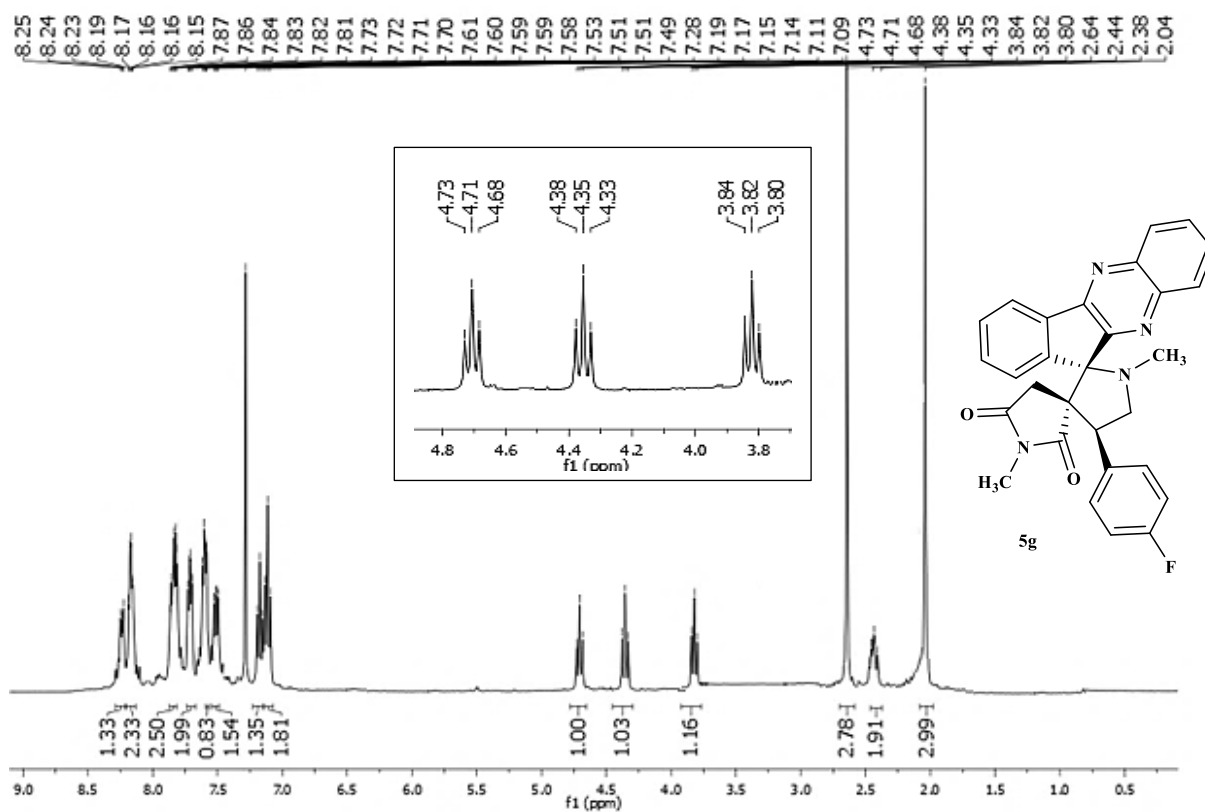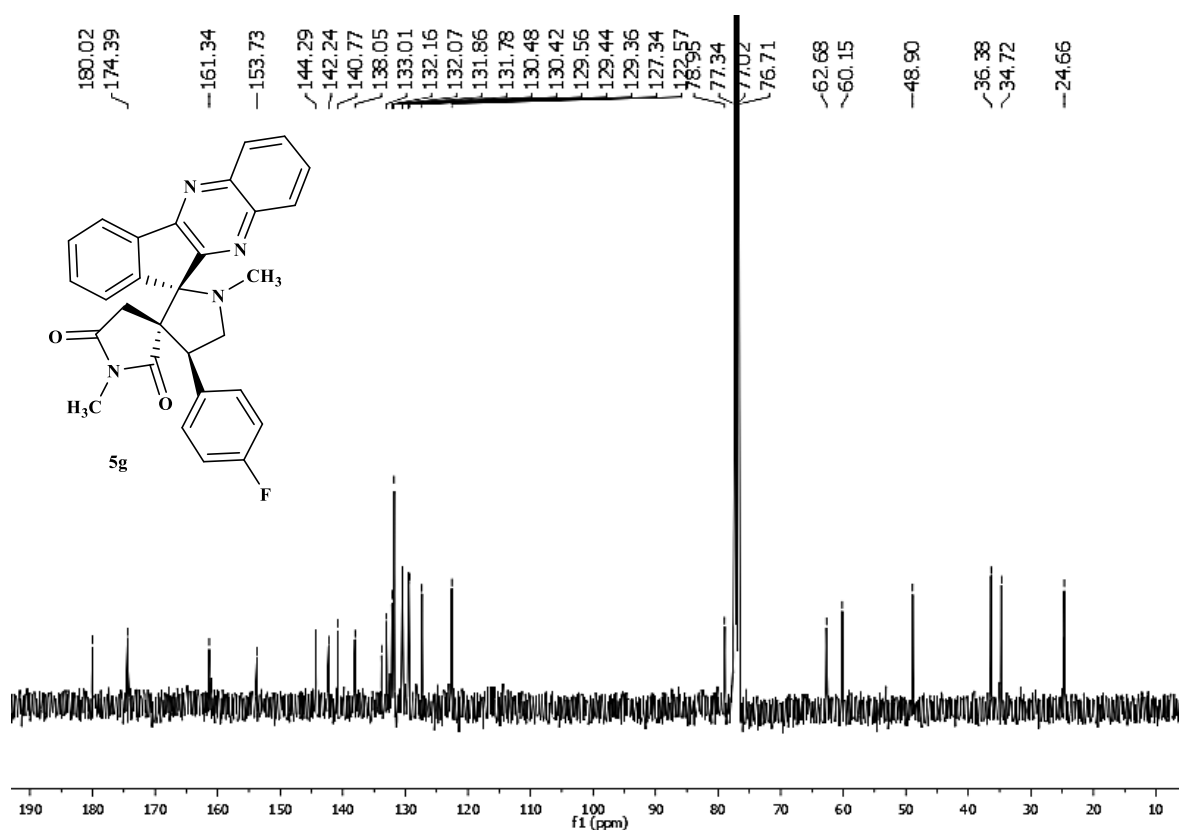



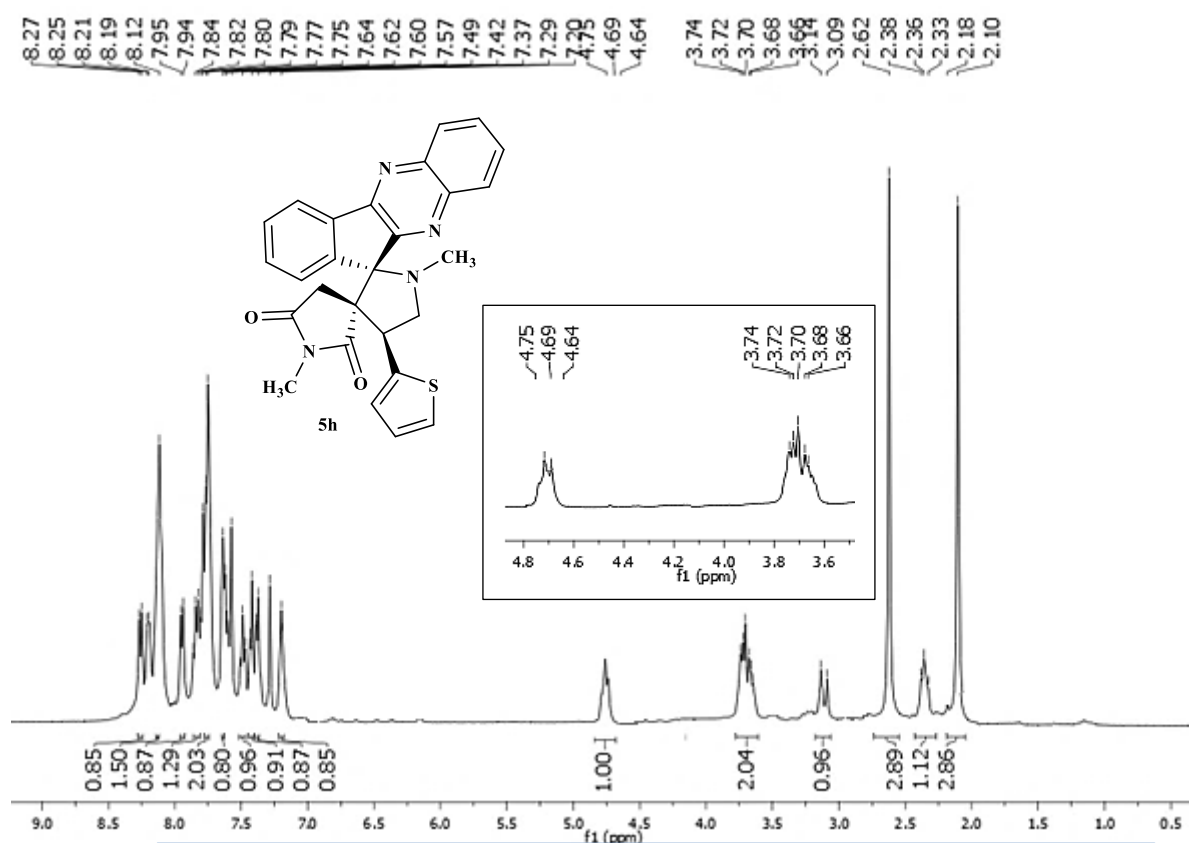

Figure S15. <sup>1</sup>H NMR (CDCl<sub>3</sub>) spectrum of Compound (5h)

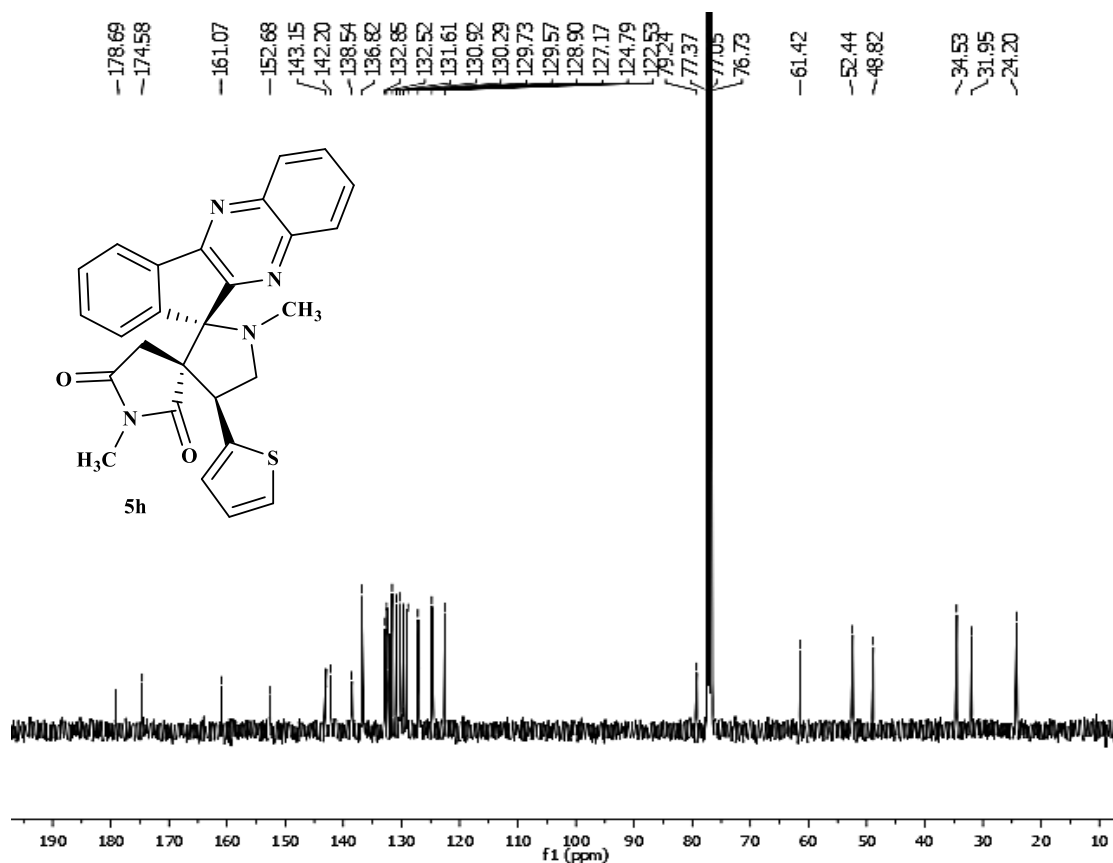

Figure S16. <sup>13</sup>C NMR (CDCl<sub>3</sub>) spectrum of Compound (5h)

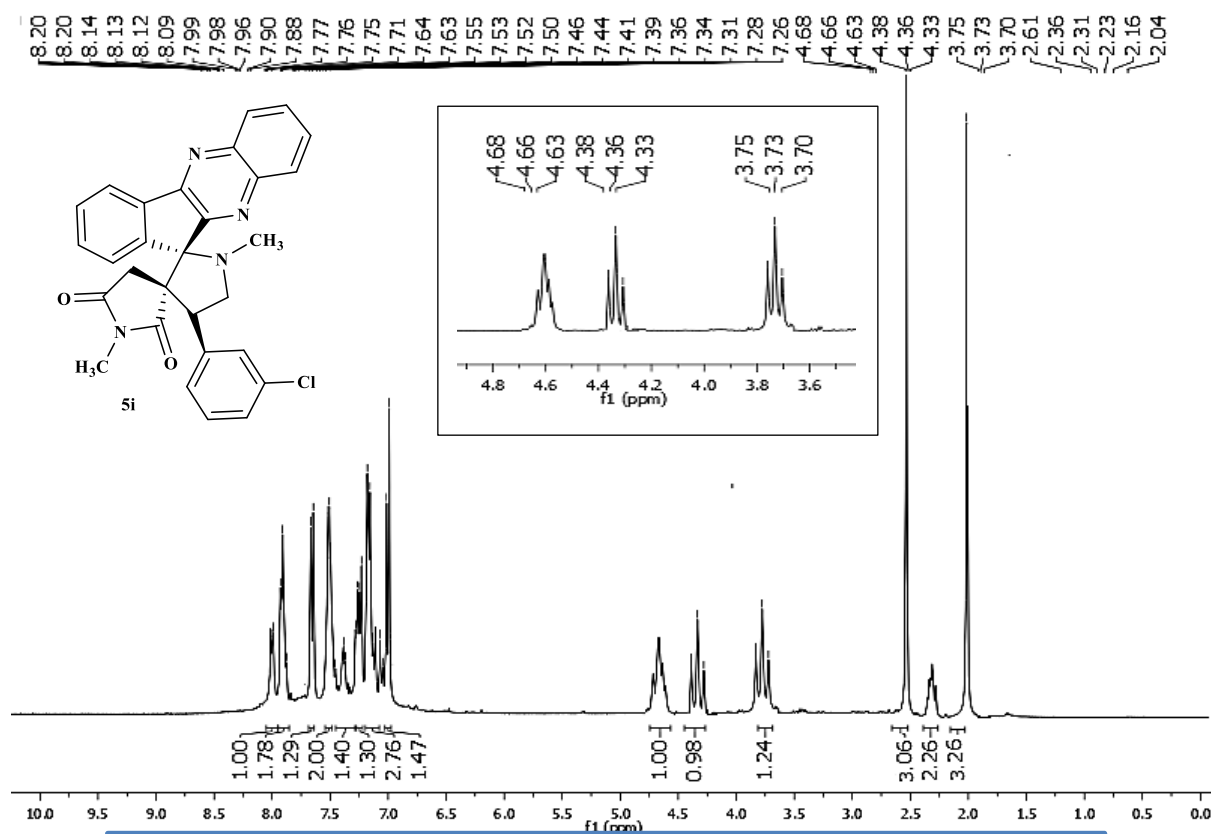

Figure S17. <sup>1</sup>H NMR (CDCl<sub>3</sub>) spectrum of Compound (5i)

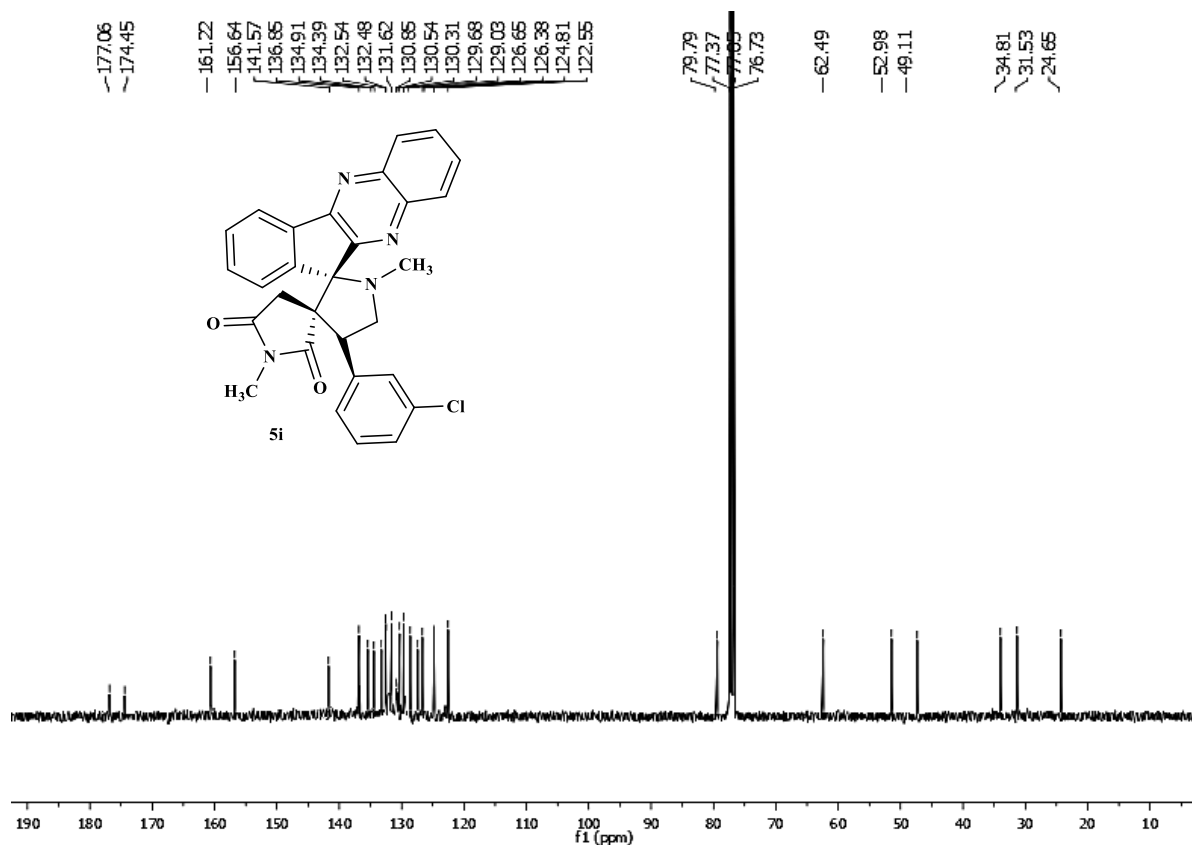

Figure S18. <sup>13</sup>C NMR (CDCl<sub>3</sub>) spectrum of Compound (5i)

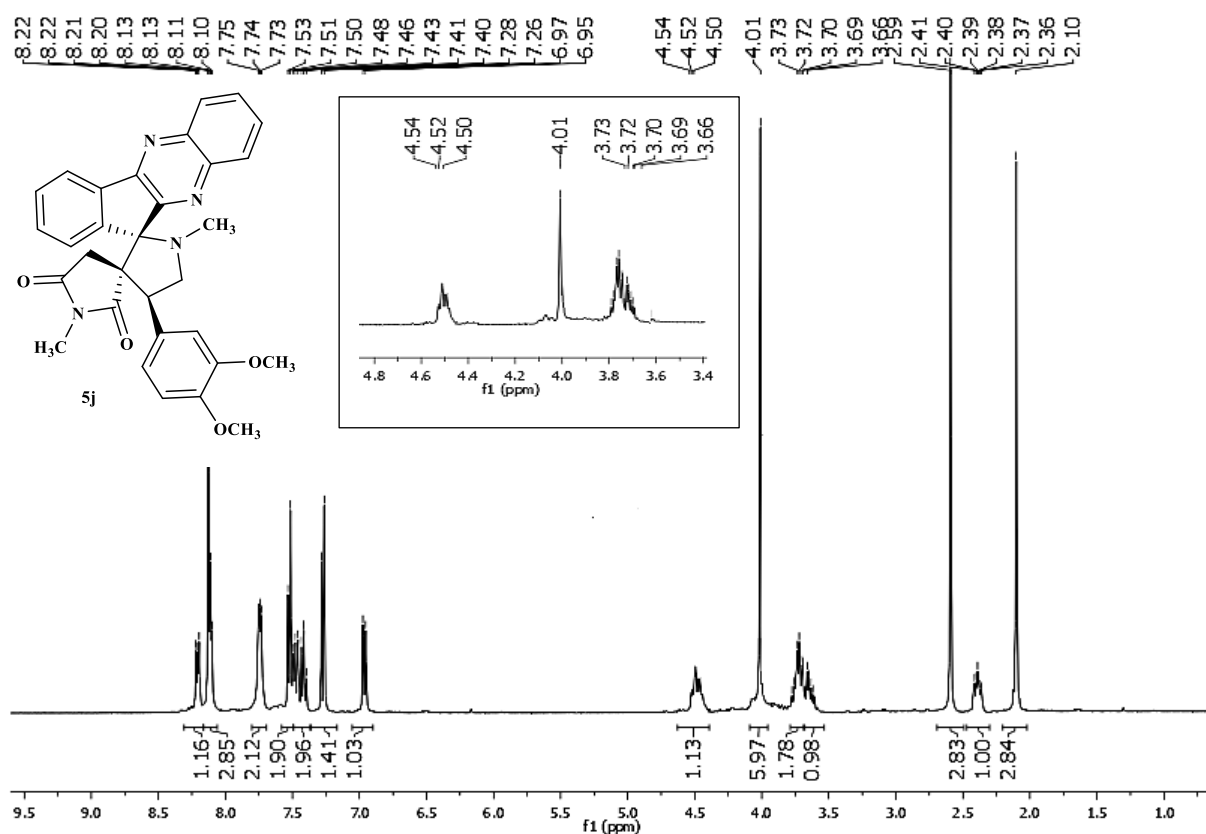

Figure S19. <sup>1</sup>H NMR (CDCl<sub>3</sub>) spectrum of Compound (5j)

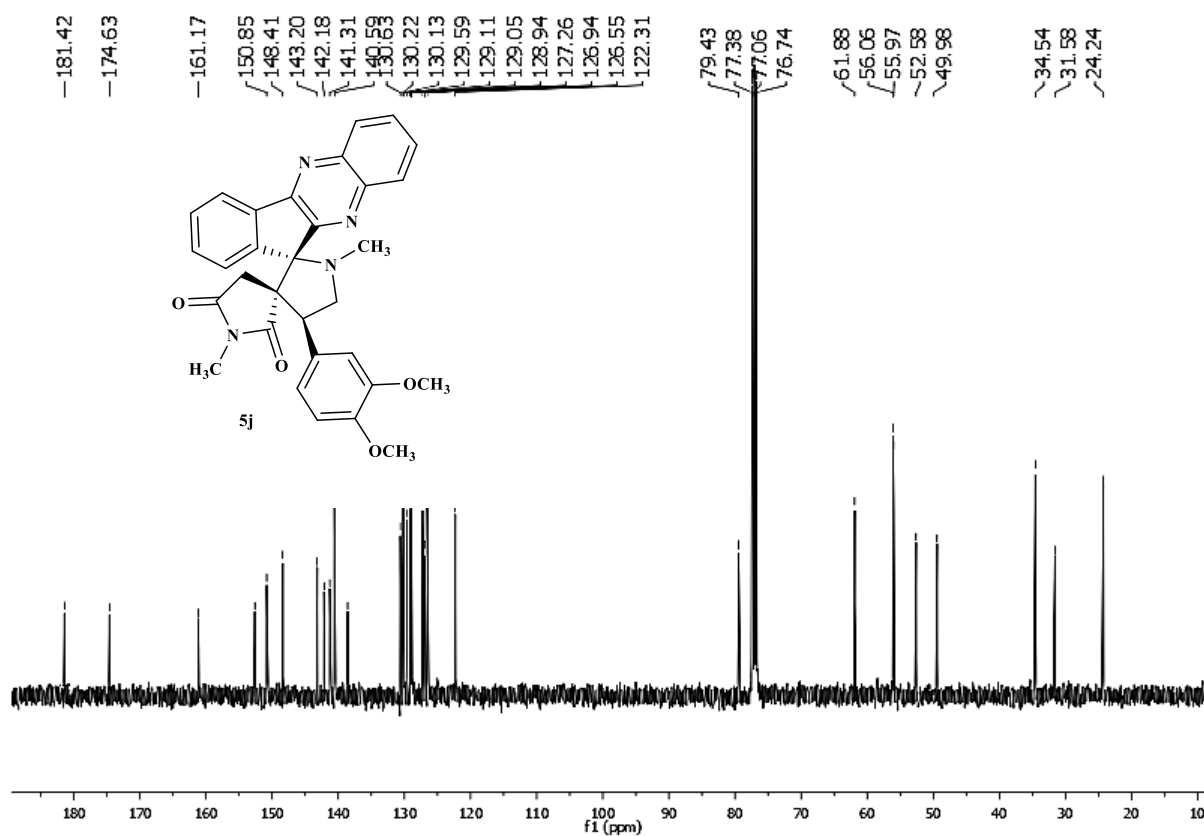

Figure S20. <sup>13</sup>C NMR (CDCl<sub>3</sub>) spectrum of Compound (5j)

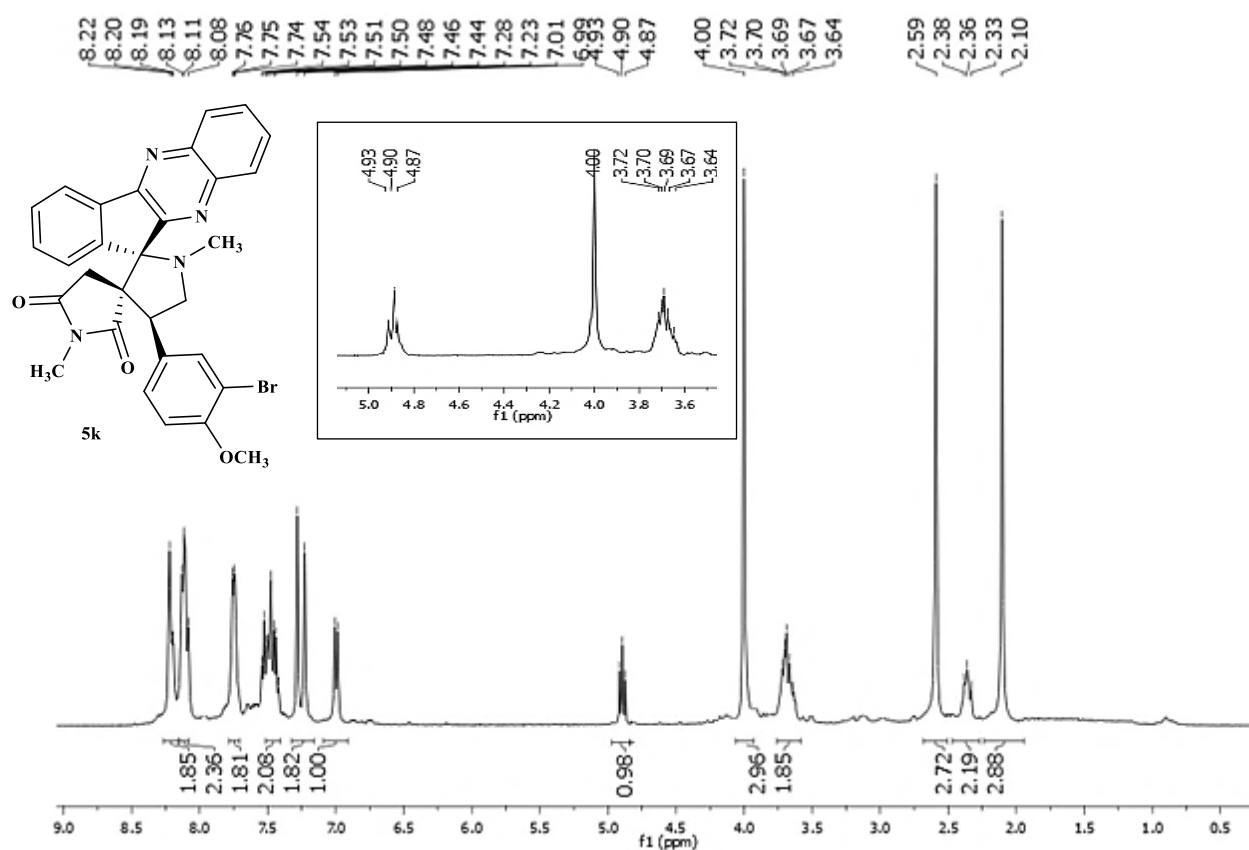

Figure S21. <sup>1</sup>H NMR (CDCl<sub>3</sub>) spectrum of Compound (5k)

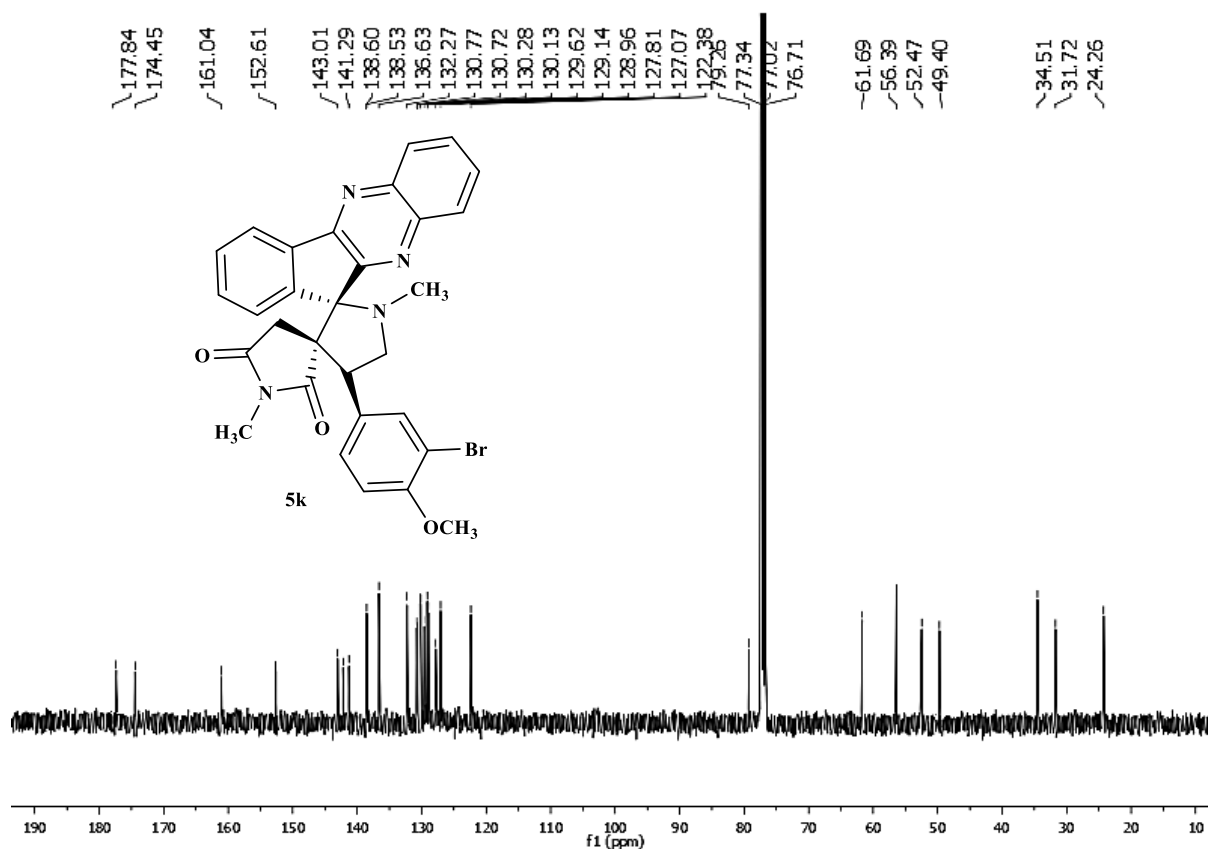

Figure S22. <sup>13</sup>C NMR (CDCl<sub>3</sub>) spectrum of Compound (5k)

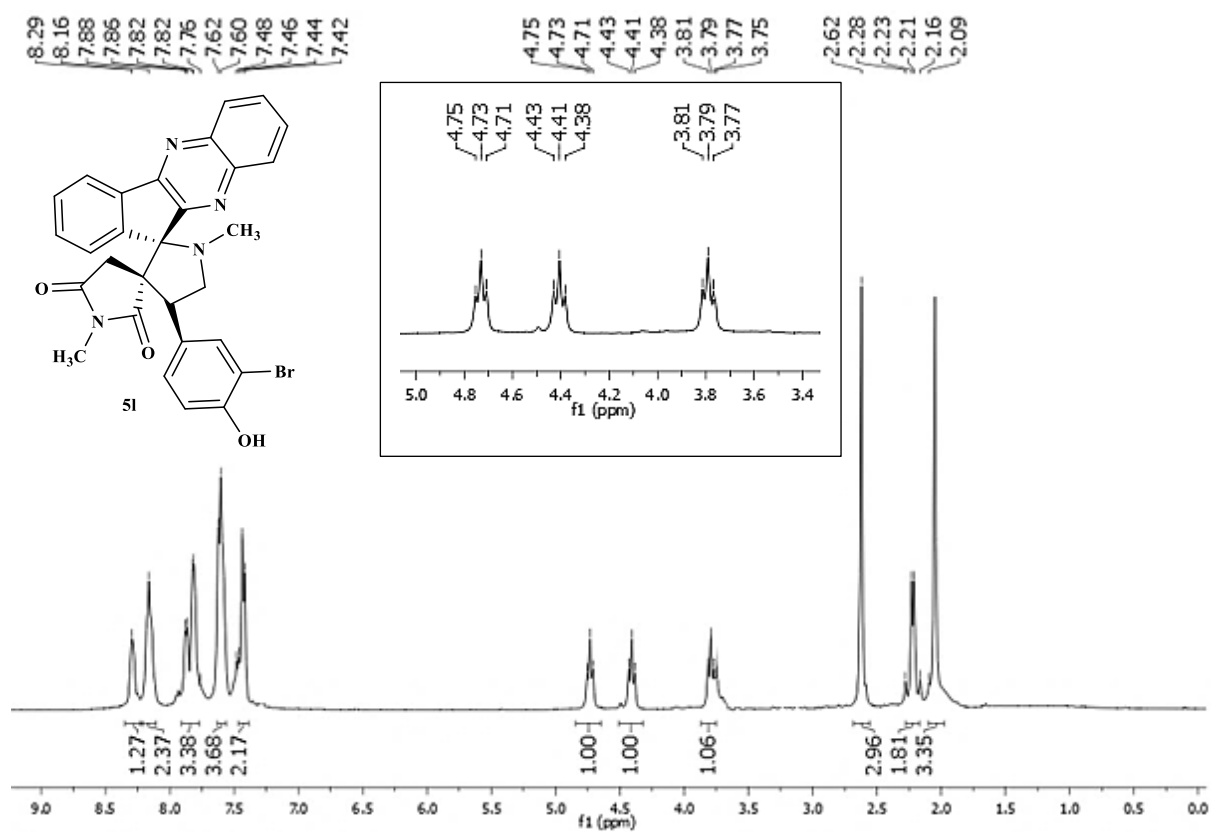

Figure S23. <sup>1</sup>H NMR (CDCl<sub>3</sub>) spectrum of Compound (5I)

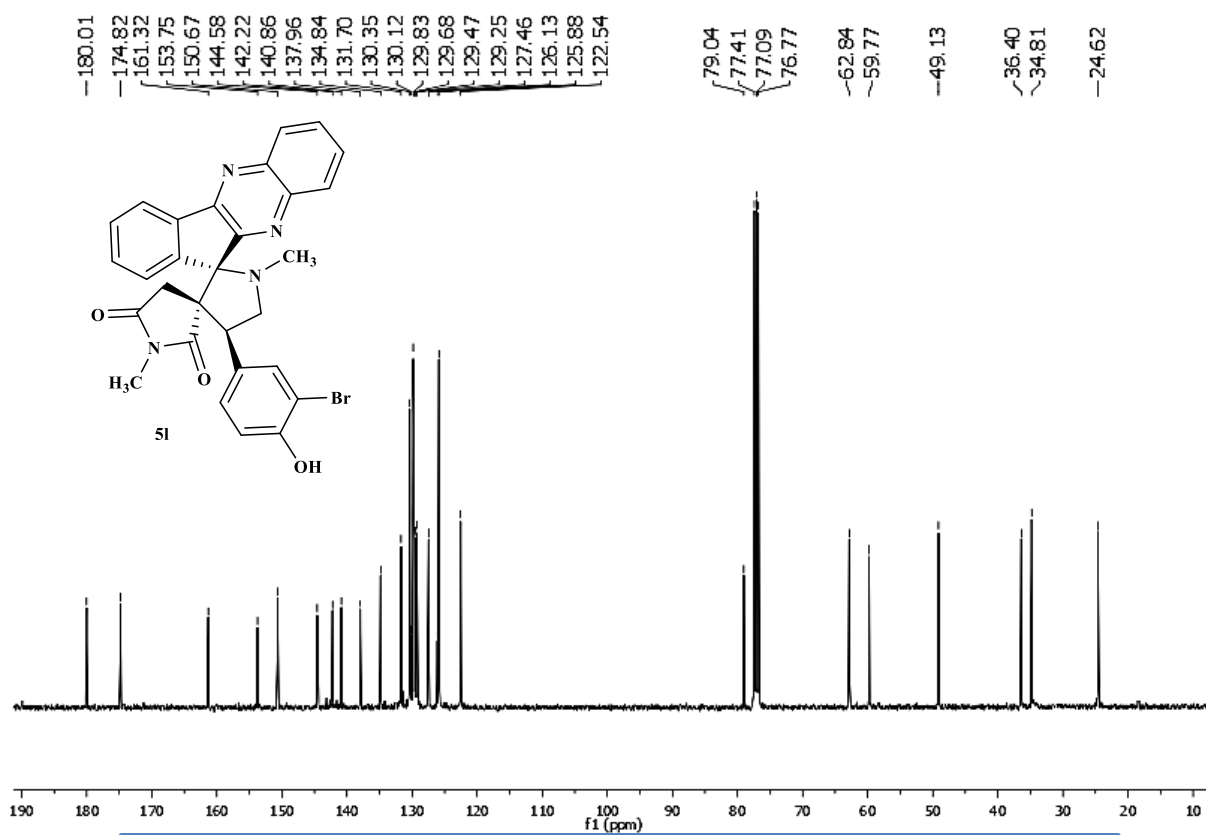

Figure S24. <sup>13</sup>C NMR (CDCl<sub>3</sub>) spectrum of Compound (5I)

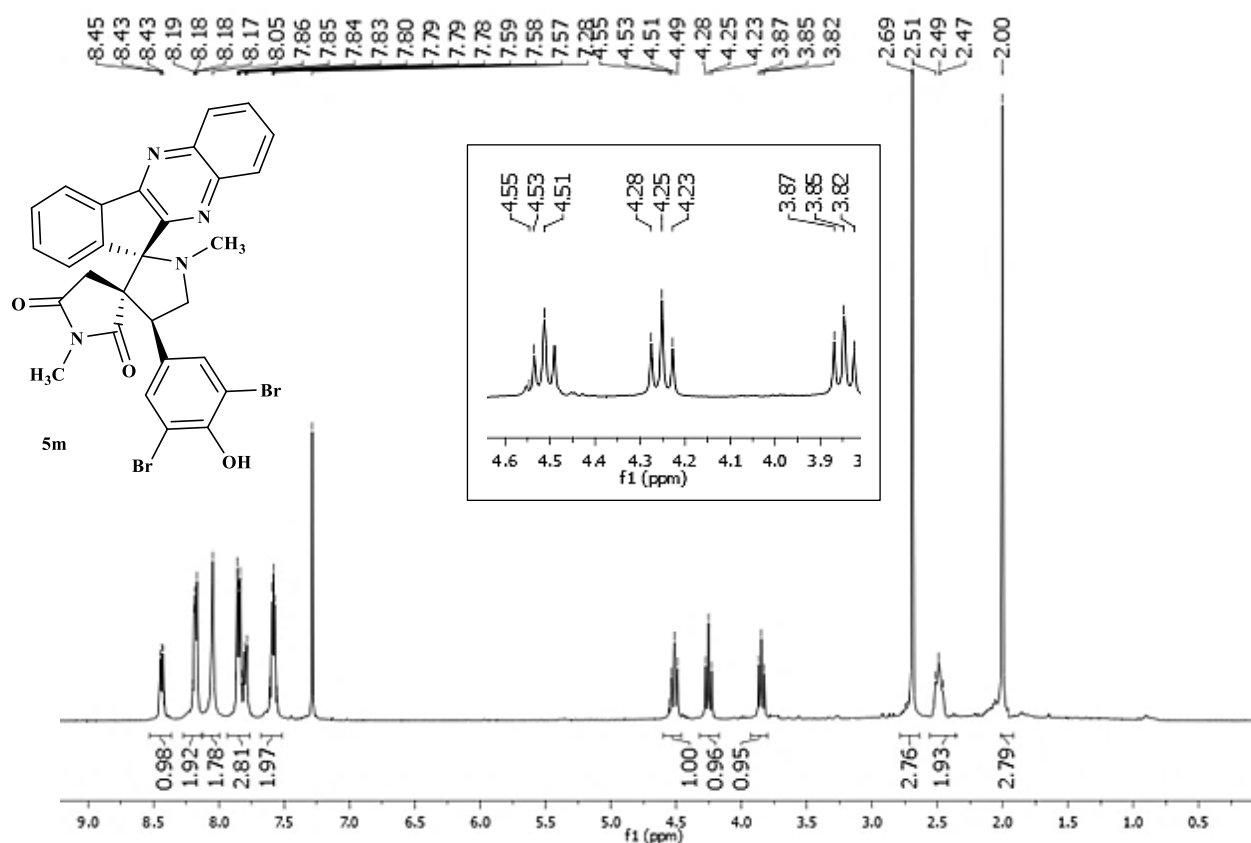

Figure S25. <sup>1</sup>H NMR (CDCl<sub>3</sub>) spectrum of compound (**5m**)

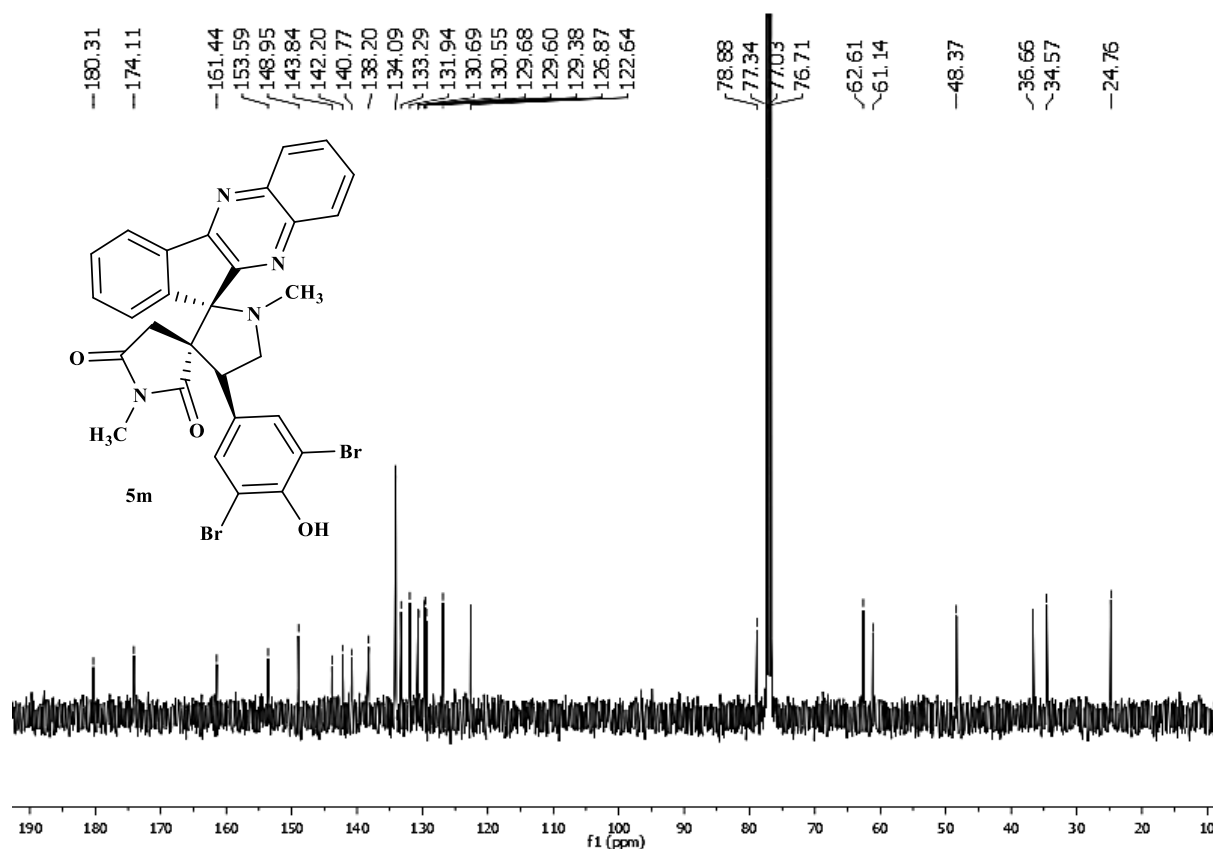

Figure S26. <sup>13</sup>C NMR (CDCl<sub>3</sub>) spectrum of Compound (**5m**)

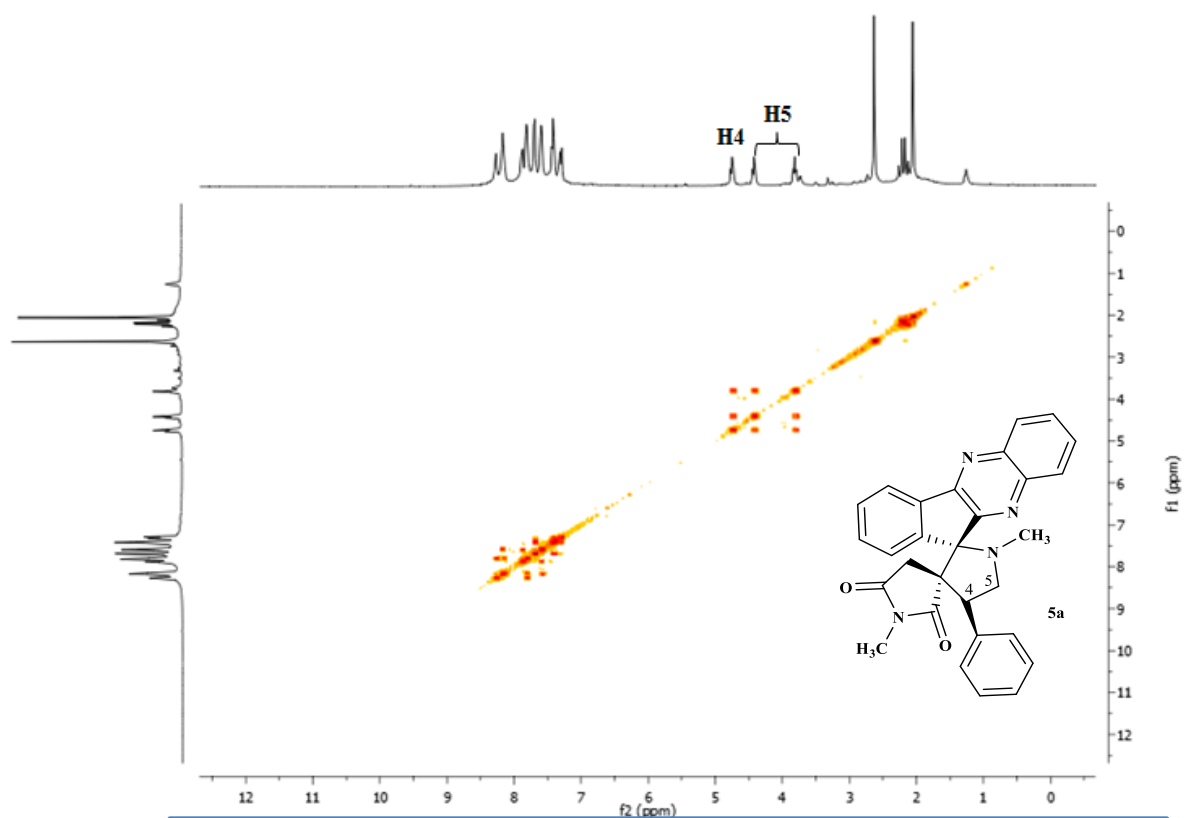

Figure S27.  $^1\text{H}$ - $^1\text{H}$  COSY ( $\text{CDCl}_3$ ) spectrum of Compound **5a**

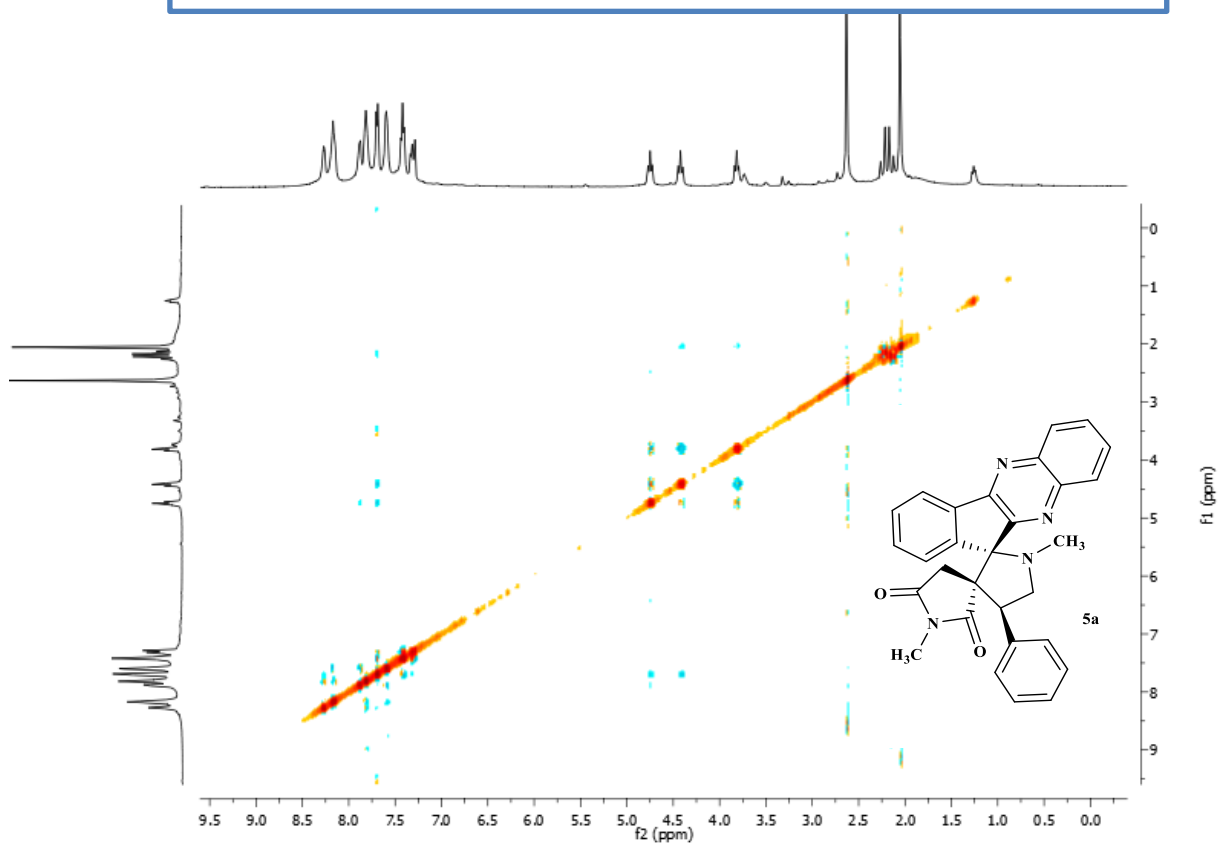

Figure S28.  $^1\text{H}$ - $^1\text{H}$  NOESY ( $\text{CDCl}_3$ ) spectrum of Compound **5a**

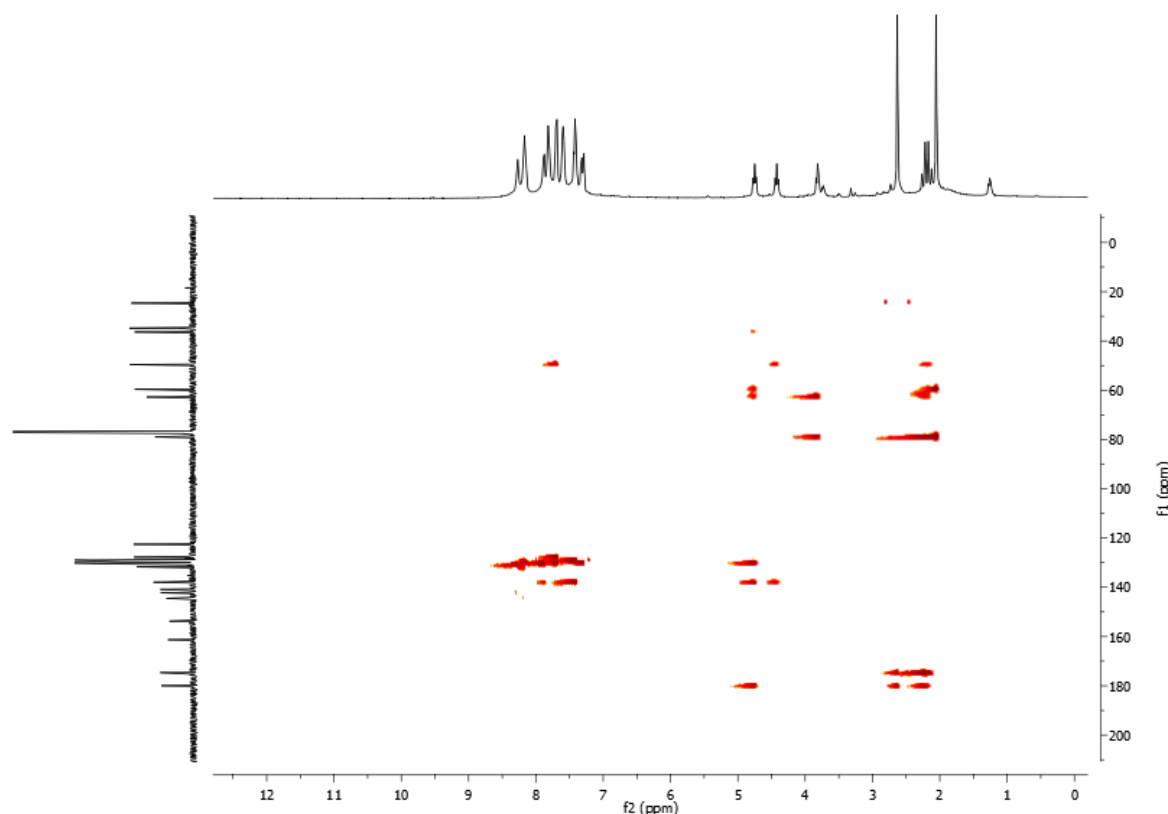

Figure S29. HMBC (CDCl<sub>3</sub>) spectrum of Compound **5a**

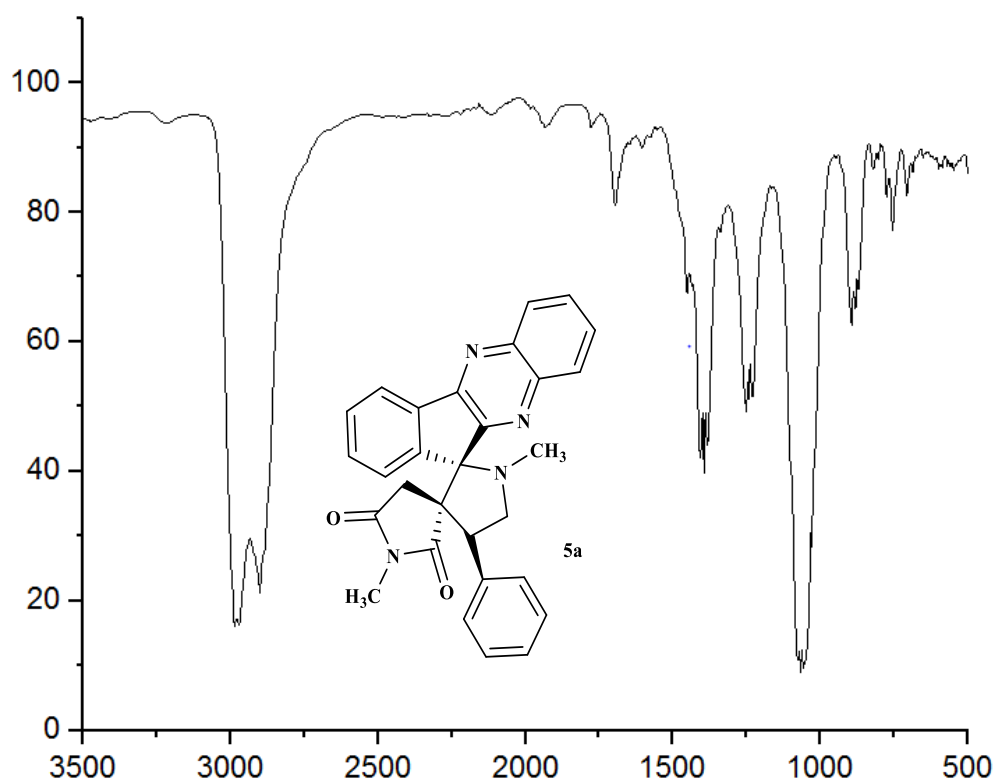

Figure S30. IR Spectra of Compound **5a**



## Molecular docking and dynamic simulation part

**Table S1:** MM–GBSA binding free energies components for the 1JIJ–5d Complex obtained from molecular dynamics trajectories.

| Frame No. | MMGBSA          |                         |                        |                      |                         |                     |
|-----------|-----------------|-------------------------|------------------------|----------------------|-------------------------|---------------------|
|           | $\Delta G$ Bind | $\Delta G$ Bind Coulomb | $\Delta G$ Bind H bond | $\Delta G$ Bind Lipo | $\Delta G$ Bind Solv GB | $\Delta G$ Bind VDW |
| 0         | −52.35          | −8.66                   | −0.50                  | −19.00               | 32.50                   | −57.37              |
| 1         | −54.04          | −7.42                   | −0.98                  | −20.28               | 36.24                   | −60.68              |
| 2         | −46.23          | −7.62                   | −0.27                  | −16.52               | 33.82                   | −55.37              |
| 3         | −53.83          | −7.46                   | −0.84                  | −18.39               | 34.37                   | −60.90              |
| 4         | −47.31          | −7.73                   | −0.87                  | −17.31               | 34.07                   | −55.91              |
| 5         | −53.73          | −7.09                   | −0.76                  | −19.21               | 34.00                   | −60.13              |
| 6         | −44.84          | −14.75                  | −0.87                  | −15.82               | 33.76                   | −48.92              |
| 7         | −49.19          | −9.96                   | −0.85                  | −17.56               | 35.16                   | −55.64              |
| 8         | −48.08          | −11.35                  | −1.05                  | −17.54               | 40.50                   | −59.87              |
| 9         | −49.79          | −8.43                   | −0.89                  | −17.89               | 36.05                   | −59.40              |
| 10        | −52.84          | −8.10                   | −1.00                  | −17.85               | 33.73                   | −58.90              |
| 11        | −55.89          | −8.34                   | −0.51                  | −20.77               | 33.21                   | −58.41              |
| 12        | −58.84          | −14.34                  | −0.79                  | −20.27               | 32.05                   | −53.22              |
| 13        | −66.11          | −12.09                  | −0.63                  | −21.02               | 29.67                   | −60.54              |
| 14        | −55.45          | −11.38                  | −0.85                  | −19.06               | 31.39                   | −54.68              |
| 15        | −60.33          | −11.61                  | −0.90                  | −21.12               | 33.10                   | −58.92              |
| 16        | −53.10          | −10.15                  | −0.83                  | −19.14               | 30.54                   | −51.05              |
| 17        | −57.23          | −9.13                   | −0.60                  | −21.37               | 30.52                   | −56.32              |
| 18        | −55.61          | −7.26                   | −0.73                  | −19.64               | 29.52                   | −56.23              |
| 19        | −56.20          | −7.69                   | −0.20                  | −20.50               | 32.71                   | −59.02              |
| 20        | −49.41          | −7.47                   | −0.75                  | −17.90               | 33.04                   | −56.54              |
| 21        | −56.15          | −4.77                   | −0.75                  | −18.98               | 29.98                   | −61.53              |
| 22        | −52.73          | −3.09                   | −0.72                  | −19.60               | 31.87                   | −60.36              |
| 23        | −52.68          | −2.10                   | −0.51                  | −18.97               | 29.20                   | −59.59              |
| 24        | −48.05          | −12.37                  | −0.94                  | −17.01               | 38.45                   | −56.47              |
| 25        | −48.42          | −5.05                   | −0.77                  | −18.65               | 30.98                   | −55.36              |
| 26        | −46.32          | −10.32                  | −1.10                  | −15.22               | 33.57                   | −53.33              |
| 27        | −45.10          | −5.90                   | −0.65                  | −16.41               | 34.05                   | −56.03              |
| 28        | −50.59          | −11.25                  | −0.45                  | −17.39               | 34.95                   | −57.27              |
| 29        | −51.62          | −7.41                   | −0.26                  | −17.69               | 30.53                   | −56.90              |
| 30        | −47.57          | −7.74                   | −0.83                  | −17.39               | 33.23                   | −55.93              |
| 31        | −50.34          | −8.13                   | −0.75                  | −18.29               | 34.60                   | −57.68              |
| 32        | −47.78          | −6.75                   | −0.78                  | −15.91               | 31.79                   | −55.79              |
| 33        | −45.48          | −4.84                   | −0.72                  | −16.92               | 32.74                   | −55.57              |
| 34        | −49.16          | −8.09                   | −0.65                  | −16.95               | 32.36                   | −55.86              |
| 35        | −51.47          | −8.23                   | −0.78                  | −16.56               | 30.38                   | −54.85              |

|    |        |        |       |        |       |        |
|----|--------|--------|-------|--------|-------|--------|
| 36 | -48.62 | -7.25  | -0.76 | -17.40 | 32.30 | -54.36 |
| 37 | -50.38 | -12.08 | -0.69 | -17.72 | 39.14 | -57.94 |
| 38 | -42.58 | -5.93  | -0.74 | -15.76 | 34.50 | -53.50 |
| 39 | -47.62 | -13.58 | -0.82 | -15.54 | 38.34 | -56.78 |
| 40 | -51.61 | -8.59  | -0.75 | -17.92 | 35.50 | -58.44 |
| 41 | -55.22 | -6.37  | -0.69 | -18.08 | 29.08 | -58.82 |
| 42 | -52.17 | -10.38 | -0.76 | -18.77 | 35.43 | -57.10 |
| 43 | -47.80 | -5.92  | -0.12 | -16.75 | 28.31 | -55.30 |
| 44 | -52.08 | -8.36  | -0.72 | -17.88 | 31.30 | -55.27 |
| 45 | -51.76 | -7.53  | -0.06 | -18.79 | 34.20 | -59.34 |
| 46 | -59.65 | -12.17 | -0.23 | -18.71 | 31.66 | -61.15 |
| 47 | -53.96 | -9.32  | -0.17 | -18.37 | 31.57 | -58.19 |
| 48 | -49.72 | -7.68  | -0.16 | -17.17 | 32.90 | -57.79 |
| 49 | -53.00 | -10.04 | -0.15 | -17.23 | 34.05 | -61.18 |
| 50 | -54.83 | -9.71  | -0.17 | -17.46 | 31.35 | -59.64 |
| 51 | -54.37 | -8.75  | -0.07 | -18.81 | 32.70 | -60.36 |
| 52 | -51.83 | -6.67  | -0.11 | -19.26 | 36.24 | -62.58 |
| 53 | -50.89 | -9.20  | -0.10 | -17.02 | 32.37 | -58.90 |
| 54 | -49.77 | -8.71  | -0.70 | -17.16 | 32.57 | -56.70 |
| 55 | -51.71 | -7.16  | 0.00  | -17.53 | 30.34 | -58.10 |
| 56 | -49.25 | -12.56 | -0.11 | -16.66 | 37.42 | -57.36 |
| 57 | -52.52 | -10.24 | -0.06 | -17.03 | 33.97 | -59.70 |
| 58 | -62.78 | -10.88 | -0.04 | -20.27 | 34.01 | -65.86 |
| 59 | -56.85 | -13.31 | -0.10 | -19.46 | 38.02 | -63.70 |
| 60 | -54.55 | -10.36 | -0.10 | -17.99 | 36.29 | -62.76 |
| 61 | -53.70 | -8.89  | -0.08 | -20.57 | 37.93 | -62.27 |
| 62 | -59.54 | -10.64 | -0.04 | -19.69 | 34.38 | -64.19 |
| 63 | -53.29 | -10.48 | -0.03 | -19.56 | 37.94 | -61.42 |
| 64 | -50.92 | -7.28  | -0.22 | -18.17 | 34.11 | -59.06 |
| 65 | -59.93 | -10.77 | -0.52 | -19.89 | 33.39 | -63.18 |
| 66 | -53.08 | -6.58  | -0.69 | -19.65 | 35.18 | -60.94 |
| 67 | -54.16 | -7.32  | -0.27 | -18.82 | 33.92 | -60.00 |
| 68 | -54.94 | -10.26 | -0.25 | -19.20 | 34.69 | -58.00 |
| 69 | -53.74 | -11.03 | -0.81 | -18.35 | 35.97 | -59.68 |
| 70 | -52.43 | -9.97  | -0.60 | -18.16 | 32.10 | -55.85 |
| 71 | -53.35 | -8.52  | -0.36 | -18.41 | 33.84 | -60.78 |
| 72 | -52.24 | -11.52 | -0.59 | -18.24 | 35.57 | -56.99 |
| 73 | -53.24 | -11.12 | -0.50 | -17.44 | 34.65 | -58.86 |
| 74 | -52.17 | -12.34 | -0.35 | -18.36 | 34.43 | -54.91 |
| 75 | -56.44 | -12.34 | -0.73 | -19.82 | 33.77 | -58.00 |
| 76 | -55.92 | -11.48 | -0.75 | -18.92 | 35.43 | -59.82 |
| 77 | -60.72 | -11.53 | -0.56 | -20.60 | 33.25 | -61.45 |
| 78 | -58.02 | -9.36  | -0.26 | -20.58 | 34.60 | -62.83 |
| 79 | -57.47 | -11.29 | -0.76 | -20.35 | 37.34 | -61.35 |
| 80 | -51.29 | -11.66 | -0.13 | -18.51 | 36.25 | -58.74 |

|                |        |        |       |        |       |        |
|----------------|--------|--------|-------|--------|-------|--------|
| 81             | -55.42 | -11.68 | -0.49 | -18.83 | 33.98 | -58.20 |
| 82             | -51.71 | -11.22 | -0.73 | -18.31 | 37.16 | -58.95 |
| 83             | -54.69 | -13.38 | -0.77 | -16.94 | 34.52 | -58.15 |
| 84             | -60.45 | -13.22 | -0.63 | -20.96 | 38.09 | -63.00 |
| 85             | -51.58 | -8.67  | -0.54 | -19.07 | 36.29 | -59.30 |
| 86             | -56.42 | -14.82 | -0.84 | -19.69 | 39.46 | -61.71 |
| 87             | -57.78 | -14.12 | -0.78 | -19.71 | 39.34 | -62.13 |
| 88             | -56.26 | -9.80  | -0.74 | -19.04 | 32.58 | -60.01 |
| 89             | -53.93 | -12.21 | -0.60 | -19.52 | 37.59 | -60.35 |
| 90             | -55.80 | -12.10 | -0.20 | -19.83 | 36.35 | -59.56 |
| 91             | -56.87 | -12.87 | -0.78 | -20.08 | 35.99 | -57.87 |
| 92             | -60.95 | -14.11 | -0.71 | -20.90 | 36.80 | -62.82 |
| 93             | -55.35 | -12.82 | -0.47 | -18.14 | 36.52 | -60.36 |
| 94             | -59.14 | -15.67 | -0.73 | -18.67 | 36.22 | -60.30 |
| 95             | -55.02 | -13.21 | -0.17 | -19.59 | 36.01 | -60.93 |
| 96             | -49.28 | -11.04 | -0.67 | -17.58 | 35.75 | -57.79 |
| 97             | -55.74 | -9.09  | -0.48 | -20.36 | 36.15 | -63.03 |
| 98             | -53.12 | -14.15 | -0.66 | -19.90 | 41.00 | -62.30 |
| 99             | -58.23 | -8.75  | -0.03 | -20.04 | 32.96 | -62.61 |
| 100            | -54.16 | -7.32  | -0.27 | -18.82 | 33.92 | -60.00 |
| <b>Maximum</b> | -66.11 | -15.67 | -1.10 | -21.37 | 28.31 | -65.86 |
| <b>Minimum</b> | -42.58 | -2.10  | 0.00  | -15.22 | 41.00 | -48.92 |
| <b>Average</b> | -53.25 | -9.72  | -0.54 | -18.56 | 34.23 | -58.70 |
| <b>STD (±)</b> | 4.19   | 2.69   | 0.30  | 1.39   | 2.63  | 2.92   |

**Table S2:** MM-GBSA binding free energies components for the 2HCK-5d Complex obtained from molecular dynamics trajectories.

| Frame No. | MMGBSA          |                         |                        |                      |                         |                     |
|-----------|-----------------|-------------------------|------------------------|----------------------|-------------------------|---------------------|
|           | $\Delta G$ Bind | $\Delta G$ Bind Coulomb | $\Delta G$ Bind H bond | $\Delta G$ Bind Lipo | $\Delta G$ Bind Solv GB | $\Delta G$ Bind VDW |
| 0         | -43.22          | -13.06                  | -0.85                  | -13.97               | 24.97                   | -42.40              |
| 1         | -33.74          | -14.84                  | -1.92                  | -11.09               | 24.99                   | -31.17              |
| 2         | -40.48          | -7.02                   | -1.81                  | -14.28               | 22.90                   | -40.31              |
| 3         | -40.92          | -13.30                  | -1.90                  | -17.54               | 23.81                   | -36.28              |
| 4         | -37.26          | -2.47                   | -0.11                  | -16.82               | 24.01                   | -43.82              |
| 5         | -37.97          | -4.77                   | -0.09                  | -14.53               | 18.48                   | -38.76              |
| 6         | -29.91          | -9.57                   | -0.67                  | -13.19               | 27.06                   | -35.13              |
| 7         | -31.02          | -2.61                   | -0.01                  | -12.87               | 21.08                   | -36.71              |
| 8         | -33.34          | -7.15                   | -0.02                  | -12.11               | 21.60                   | -36.37              |
| 9         | -40.36          | -6.61                   | -0.04                  | -15.13               | 21.34                   | -41.14              |
| 10        | -44.83          | -6.54                   | -0.16                  | -15.53               | 22.14                   | -45.08              |
| 11        | -38.79          | -5.82                   | -0.01                  | -14.54               | 22.23                   | -41.12              |
| 12        | -37.17          | -7.42                   | 0.00                   | -13.70               | 20.61                   | -37.06              |
| 13        | -39.72          | -8.84                   | -0.03                  | -13.57               | 23.19                   | -40.82              |
| 14        | -40.14          | -9.26                   | -0.02                  | -14.67               | 23.07                   | -40.38              |
| 15        | -40.25          | -7.76                   | -0.03                  | -14.92               | 23.03                   | -42.15              |
| 16        | -42.99          | -1.65                   | -0.04                  | -15.72               | 19.90                   | -46.01              |
| 17        | -34.67          | -7.15                   | 0.00                   | -13.86               | 24.35                   | -39.39              |
| 18        | -39.82          | -5.34                   | -0.06                  | -14.30               | 20.18                   | -40.65              |
| 19        | -35.37          | -11.06                  | -0.07                  | -13.45               | 23.45                   | -34.65              |
| 20        | -41.40          | -5.67                   | -0.01                  | -14.79               | 21.86                   | -42.91              |
| 21        | -37.15          | -9.65                   | 0.00                   | -13.01               | 22.63                   | -36.20              |
| 22        | -37.30          | -11.87                  | 0.00                   | -13.53               | 24.28                   | -36.43              |
| 23        | -33.18          | -7.84                   | 0.00                   | -13.42               | 25.54                   | -37.61              |
| 24        | -37.94          | -6.27                   | -0.06                  | -14.05               | 22.89                   | -41.17              |
| 25        | -35.21          | -7.87                   | 0.00                   | -13.24               | 21.46                   | -36.21              |
| 26        | -36.16          | -7.74                   | 0.00                   | -13.08               | 20.79                   | -36.31              |
| 27        | -35.50          | -8.00                   | 0.00                   | -12.74               | 21.66                   | -36.44              |
| 28        | -41.33          | -7.12                   | -0.02                  | -14.86               | 23.92                   | -43.64              |
| 29        | -39.35          | -10.03                  | 0.00                   | -15.17               | 25.20                   | -40.17              |
| 30        | -37.55          | -7.36                   | -0.01                  | -14.96               | 24.37                   | -41.27              |
| 31        | -35.71          | -7.43                   | -0.02                  | -13.80               | 25.11                   | -40.18              |
| 32        | -36.34          | -9.37                   | -0.02                  | -13.83               | 23.83                   | -38.79              |
| 33        | -35.21          | -10.20                  | 0.00                   | -12.67               | 23.40                   | -35.49              |
| 34        | -38.89          | -7.18                   | -0.05                  | -14.01               | 23.72                   | -41.80              |
| 35        | -34.60          | -9.61                   | -0.01                  | -13.10               | 24.30                   | -36.83              |
| 36        | -28.67          | -5.82                   | 0.00                   | -13.09               | 26.09                   | -38.03              |
| 37        | -34.50          | -8.93                   | 0.00                   | -13.54               | 24.94                   | -36.96              |
| 38        | -41.61          | -6.62                   | -0.05                  | -14.35               | 23.37                   | -44.44              |

|    |        |       |       |        |       |        |
|----|--------|-------|-------|--------|-------|--------|
| 39 | -35.30 | -7.86 | -0.04 | -12.59 | 22.36 | -37.87 |
| 40 | -35.43 | -7.09 | -0.02 | -14.16 | 21.69 | -36.47 |
| 41 | -42.24 | -4.39 | -0.26 | -15.39 | 21.37 | -44.33 |
| 42 | -38.38 | -5.60 | -0.08 | -14.54 | 23.08 | -41.51 |
| 43 | -40.19 | -1.85 | -0.09 | -14.52 | 20.90 | -45.13 |
| 44 | -35.90 | -7.79 | -0.02 | -13.37 | 25.11 | -41.02 |
| 45 | -44.39 | -6.88 | -0.40 | -14.80 | 20.73 | -43.89 |
| 46 | -52.98 | -8.90 | -0.56 | -17.21 | 21.55 | -48.77 |
| 47 | -42.35 | -3.61 | -0.21 | -15.30 | 22.28 | -45.78 |
| 48 | -50.57 | -8.82 | -0.53 | -16.93 | 23.06 | -47.75 |
| 49 | -34.19 | -7.16 | 0.00  | -12.06 | 20.84 | -35.96 |
| 50 | -39.40 | -6.25 | -0.10 | -14.64 | 23.97 | -42.80 |
| 51 | -39.73 | -7.72 | -0.01 | -15.04 | 20.93 | -37.95 |
| 52 | -39.05 | -7.17 | -0.01 | -14.03 | 21.18 | -38.90 |
| 53 | -31.76 | -6.93 | 0.00  | -11.91 | 21.79 | -34.48 |
| 54 | -38.32 | -6.72 | 0.00  | -12.89 | 21.18 | -40.16 |
| 55 | -38.15 | -7.27 | -0.01 | -14.64 | 22.48 | -38.89 |
| 56 | -39.07 | -5.50 | -0.01 | -14.44 | 19.84 | -39.21 |
| 57 | -39.72 | -7.36 | -0.14 | -14.67 | 21.24 | -38.45 |
| 58 | -40.32 | -6.00 | 0.00  | -15.54 | 19.73 | -38.53 |
| 59 | -39.03 | -4.38 | 0.00  | -15.96 | 21.57 | -40.74 |
| 60 | -35.86 | -3.33 | -0.01 | -14.61 | 19.73 | -38.01 |
| 61 | -36.86 | -8.09 | -0.01 | -12.63 | 22.10 | -38.38 |
| 62 | -35.95 | -8.39 | -0.04 | -12.94 | 22.08 | -36.41 |
| 63 | -33.58 | -7.91 | 0.00  | -12.90 | 21.22 | -33.89 |
| 64 | -38.27 | -7.63 | 0.00  | -13.65 | 21.97 | -39.37 |
| 65 | -39.13 | -6.95 | -0.02 | -11.29 | 17.72 | -39.14 |
| 66 | -24.68 | -5.40 | -0.25 | -8.26  | 15.66 | -27.21 |
| 67 | -27.38 | -4.37 | -0.04 | -10.39 | 16.57 | -30.40 |
| 68 | -23.05 | -1.85 | -0.16 | -7.45  | 13.04 | -26.29 |
| 69 | -19.27 | -3.72 | 0.00  | -7.62  | 11.50 | -19.49 |
| 70 | -20.54 | -0.90 | 0.00  | -7.99  | 11.31 | -25.59 |
| 71 | -19.47 | -4.19 | 0.00  | -5.31  | 8.72  | -21.67 |
| 72 | -22.43 | -8.70 | -0.02 | -6.88  | 13.58 | -23.76 |
| 73 | -16.86 | -0.35 | 0.00  | -5.63  | 8.37  | -19.06 |
| 74 | -44.52 | -1.34 | -0.30 | -23.08 | 18.43 | -41.25 |
| 75 | -17.36 | -1.80 | 0.00  | -4.62  | 7.89  | -19.13 |
| 76 | -15.83 | -3.29 | -0.02 | -6.55  | 10.20 | -18.86 |
| 77 | -17.46 | -2.94 | 0.00  | -6.37  | 11.29 | -19.37 |
| 78 | -34.13 | -8.02 | -0.64 | -16.10 | 14.70 | -24.93 |
| 79 | -33.14 | -3.28 | -0.05 | -14.42 | 10.32 | -26.89 |
| 80 | -34.14 | -5.45 | -0.02 | -15.53 | 11.34 | -23.39 |
| 81 | -32.19 | -5.18 | 0.00  | -13.81 | 12.10 | -26.64 |
| 82 | -39.75 | -8.01 | -1.19 | -15.25 | 17.32 | -31.98 |
| 83 | -26.85 | -2.95 | 0.00  | -11.24 | 11.12 | -25.27 |

|                |        |        |       |        |       |        |
|----------------|--------|--------|-------|--------|-------|--------|
| 84             | -25.43 | -4.10  | -0.61 | -12.68 | 15.34 | -24.08 |
| 85             | -22.84 | -7.69  | -0.30 | -5.36  | 10.92 | -21.37 |
| 86             | -20.93 | -8.05  | -0.63 | -4.30  | 9.33  | -20.28 |
| 87             | -23.79 | -11.11 | -1.53 | -9.02  | 18.11 | -21.93 |
| 88             | -28.65 | -2.14  | 0.00  | -12.64 | 11.37 | -25.16 |
| 89             | -31.44 | -5.29  | -0.18 | -15.19 | 16.99 | -26.16 |
| 90             | -35.28 | -5.37  | -0.44 | -15.12 | 17.10 | -32.10 |
| 91             | -36.77 | -9.14  | -0.80 | -14.24 | 18.66 | -30.66 |
| 92             | -22.44 | -6.22  | -0.22 | -5.53  | 14.79 | -25.65 |
| 93             | -31.30 | 0.21   | -0.16 | -14.15 | 13.38 | -29.57 |
| 94             | -26.56 | -3.20  | -0.34 | -11.99 | 17.32 | -29.32 |
| 95             | -30.50 | -10.89 | -0.59 | -8.97  | 20.54 | -32.02 |
| 96             | -24.90 | -0.87  | -0.01 | -11.89 | 7.56  | -18.91 |
| 97             | -27.81 | -0.42  | 0.00  | -13.63 | 11.18 | -23.91 |
| 98             | -24.91 | -0.68  | -0.03 | -13.60 | 12.53 | -22.52 |
| 99             | -22.37 | -1.50  | 0.00  | -9.04  | 9.66  | -21.68 |
| 100            | -28.65 | -2.14  | 0.00  | -12.64 | 11.37 | -25.16 |
| <b>Maximum</b> | -52.98 | -14.84 | -1.92 | -23.08 | 7.56  | -48.77 |
| <b>Minimum</b> | -15.83 | 0.21   | 0.00  | -4.30  | 27.06 | -18.86 |
| <b>Average</b> | -34.15 | -6.28  | -0.19 | -12.93 | 19.24 | -34.61 |
| <b>STD (±)</b> | 7.53   | 3.06   | 0.40  | 3.15   | 5.13  | 7.98   |

**Table S3:** MM-GBSA binding free energies components for the 2QV4-5d Complex obtained from molecular dynamics trajectories.

| Frame No. | MMGBSA          |                         |                        |                      |                         |                     |
|-----------|-----------------|-------------------------|------------------------|----------------------|-------------------------|---------------------|
|           | $\Delta G$ Bind | $\Delta G$ Bind Coulomb | $\Delta G$ Bind H bond | $\Delta G$ Bind Lipo | $\Delta G$ Bind Solv GB | $\Delta G$ Bind VDW |
| 0         | -58.80          | -13.22                  | -1.33                  | -24.03               | 23.68                   | -41.83              |
| 1         | -39.42          | -5.75                   | -0.06                  | -18.61               | 17.74                   | -30.82              |
| 2         | -58.32          | -10.30                  | -1.03                  | -23.40               | 17.88                   | -43.08              |
| 3         | -60.39          | -2.17                   | -0.47                  | -25.95               | 16.29                   | -46.10              |
| 4         | -60.28          | -3.37                   | -0.72                  | -25.52               | 17.85                   | -47.72              |
| 5         | -56.12          | -8.97                   | -0.62                  | -25.22               | 22.31                   | -46.31              |
| 6         | -59.56          | -2.14                   | -0.66                  | -24.75               | 14.73                   | -45.33              |
| 7         | -63.86          | -11.27                  | -1.04                  | -25.26               | 17.72                   | -47.60              |
| 8         | -58.33          | -2.22                   | -0.37                  | -24.92               | 15.94                   | -44.70              |
| 9         | -61.53          | -7.79                   | -0.94                  | -25.39               | 17.09                   | -43.38              |
| 10        | -55.05          | -4.75                   | -0.49                  | -25.01               | 17.13                   | -41.66              |
| 11        | -61.62          | -7.68                   | -0.86                  | -24.20               | 17.02                   | -44.75              |
| 12        | -58.94          | -3.19                   | -0.61                  | -24.59               | 16.45                   | -44.76              |
| 13        | -67.66          | -7.11                   | -0.80                  | -26.22               | 16.06                   | -48.61              |
| 14        | -61.29          | -7.58                   | -0.49                  | -26.43               | 20.51                   | -50.47              |
| 15        | -58.58          | -5.10                   | -0.53                  | -25.68               | 17.57                   | -47.19              |
| 16        | -55.00          | -6.02                   | -0.05                  | -25.47               | 22.46                   | -43.54              |
| 17        | -62.42          | -6.43                   | -0.68                  | -26.61               | 18.04                   | -47.42              |
| 18        | -64.44          | -4.06                   | -0.59                  | -26.49               | 16.87                   | -49.13              |
| 19        | -62.66          | -3.72                   | -0.48                  | -26.95               | 17.12                   | -50.92              |
| 20        | -60.40          | -3.42                   | -0.69                  | -25.27               | 19.08                   | -49.26              |
| 21        | -63.66          | -5.39                   | -0.50                  | -26.15               | 16.06                   | -45.62              |
| 22        | -67.41          | -4.28                   | -0.47                  | -26.20               | 16.86                   | -50.25              |
| 23        | -58.78          | -6.16                   | -0.73                  | -24.48               | 20.43                   | -47.30              |
| 24        | -59.79          | -5.69                   | -0.58                  | -25.17               | 18.59                   | -46.11              |
| 25        | -61.47          | -3.49                   | -0.30                  | -26.41               | 18.94                   | -47.84              |
| 26        | -63.27          | -7.98                   | -0.60                  | -25.21               | 18.92                   | -49.19              |
| 27        | -47.83          | -5.63                   | -0.02                  | -19.98               | 15.84                   | -37.75              |
| 28        | -29.11          | 1.32                    | 0.00                   | -16.85               | 19.70                   | -33.21              |
| 29        | -45.31          | -1.90                   | -0.06                  | -21.18               | 20.04                   | -41.99              |
| 30        | -48.33          | -4.26                   | -0.54                  | -19.55               | 16.06                   | -39.67              |
| 31        | -42.98          | -7.04                   | 0.00                   | -19.01               | 18.35                   | -34.66              |
| 32        | -37.67          | -6.32                   | 0.00                   | -17.75               | 19.64                   | -32.31              |
| 33        | -49.42          | -6.57                   | -0.02                  | -19.59               | 17.63                   | -39.08              |
| 34        | -46.63          | -4.13                   | -0.07                  | -20.23               | 17.95                   | -40.07              |
| 35        | -53.89          | -1.62                   | -0.05                  | -23.56               | 19.87                   | -44.83              |
| 36        | -46.48          | -3.64                   | -0.17                  | -19.32               | 16.40                   | -39.97              |

|    |        |        |       |        |       |        |
|----|--------|--------|-------|--------|-------|--------|
| 37 | -46.14 | -6.41  | -0.09 | -18.90 | 17.88 | -38.92 |
| 38 | -46.42 | -2.51  | -0.04 | -20.67 | 19.48 | -43.06 |
| 39 | -47.75 | -6.97  | -0.41 | -20.22 | 18.33 | -41.11 |
| 40 | -48.37 | -5.07  | -0.42 | -19.07 | 16.75 | -40.70 |
| 41 | -48.22 | -3.10  | -0.13 | -20.73 | 19.62 | -41.58 |
| 42 | -50.75 | -5.45  | -0.46 | -18.93 | 15.82 | -42.20 |
| 43 | -47.00 | -5.34  | -0.05 | -18.91 | 18.44 | -39.58 |
| 44 | -54.90 | -3.15  | -0.25 | -25.29 | 19.45 | -43.28 |
| 45 | -46.25 | -6.64  | -0.11 | -18.22 | 17.71 | -39.15 |
| 46 | -49.25 | -2.87  | -0.24 | -20.02 | 16.42 | -40.01 |
| 47 | -51.99 | -5.06  | -0.30 | -18.86 | 17.89 | -43.96 |
| 48 | -51.33 | -3.64  | -0.31 | -19.72 | 16.49 | -42.75 |
| 49 | -46.37 | -3.22  | -0.07 | -19.50 | 18.62 | -41.01 |
| 50 | -56.95 | -0.36  | -0.34 | -24.68 | 16.24 | -44.39 |
| 51 | -57.57 | -2.29  | -0.14 | -21.84 | 14.13 | -43.56 |
| 52 | -47.17 | -6.17  | 0.00  | -21.53 | 21.12 | -37.23 |
| 53 | -45.16 | -1.57  | 0.00  | -19.53 | 15.92 | -37.25 |
| 54 | -44.88 | -4.36  | 0.00  | -21.40 | 20.22 | -36.26 |
| 55 | -38.73 | 2.89   | 0.00  | -19.70 | 14.78 | -34.82 |
| 56 | -41.68 | -4.33  | 0.00  | -17.45 | 15.07 | -33.57 |
| 57 | -31.29 | 0.59   | 0.00  | -17.80 | 12.76 | -27.64 |
| 58 | -29.03 | 2.89   | -0.01 | -15.16 | 12.00 | -28.82 |
| 59 | -36.94 | -0.30  | -0.59 | -18.91 | 17.09 | -34.08 |
| 60 | -39.82 | -1.75  | -0.61 | -19.23 | 17.89 | -35.91 |
| 61 | -34.78 | -1.84  | -0.61 | -17.83 | 16.93 | -32.20 |
| 62 | -33.75 | 3.19   | -0.04 | -17.15 | 11.71 | -32.84 |
| 63 | -31.88 | 1.59   | 0.00  | -16.92 | 13.13 | -29.98 |
| 64 | -45.27 | -8.43  | -0.53 | -18.42 | 14.75 | -32.40 |
| 65 | -37.17 | 1.54   | 0.00  | -19.52 | 13.46 | -32.36 |
| 66 | -41.08 | -7.31  | -0.53 | -17.39 | 14.97 | -31.03 |
| 67 | -43.77 | -10.69 | -0.56 | -19.54 | 18.42 | -31.77 |
| 68 | -42.81 | -8.43  | -0.55 | -17.33 | 14.91 | -31.62 |
| 69 | -38.05 | -5.16  | -0.58 | -18.36 | 17.07 | -31.63 |
| 70 | -40.73 | -4.75  | -0.54 | -17.97 | 14.01 | -30.87 |
| 71 | -37.75 | 2.89   | 0.00  | -18.74 | 12.56 | -34.67 |
| 72 | -34.59 | 0.93   | -0.04 | -17.64 | 17.04 | -34.78 |
| 73 | -33.65 | 2.55   | 0.00  | -17.57 | 12.33 | -31.47 |
| 74 | -42.56 | -7.72  | -0.52 | -17.53 | 13.10 | -30.69 |
| 75 | -44.92 | -2.86  | -0.52 | -20.34 | 14.31 | -34.48 |
| 76 | -39.21 | -7.40  | -0.49 | -17.38 | 16.90 | -31.26 |
| 77 | -34.67 | 0.55   | -0.04 | -18.43 | 14.77 | -33.54 |
| 78 | -42.54 | -6.87  | -0.53 | -18.60 | 17.90 | -34.57 |
| 79 | -32.60 | 1.01   | -0.02 | -17.19 | 16.43 | -33.56 |
| 80 | -34.66 | 2.13   | -0.02 | -16.77 | 14.15 | -34.00 |
| 81 | -29.98 | 2.11   | 0.00  | -14.53 | 11.54 | -28.63 |



|                               |        |        |       |        |       |        |
|-------------------------------|--------|--------|-------|--------|-------|--------|
| 82                            | -32.05 | 3.04   | -0.02 | -16.22 | 11.50 | -29.87 |
| 83                            | -32.32 | 2.22   | -0.01 | -15.64 | 12.50 | -30.85 |
| 84                            | -34.45 | 2.43   | -0.01 | -17.74 | 13.26 | -32.34 |
| 85                            | -38.88 | -7.32  | -0.56 | -18.03 | 17.83 | -30.89 |
| 86                            | -42.59 | -7.90  | -0.54 | -18.33 | 17.27 | -33.75 |
| 87                            | -38.74 | -8.59  | -0.53 | -17.93 | 17.00 | -29.02 |
| 88                            | -42.79 | -7.14  | -0.53 | -18.64 | 14.68 | -31.48 |
| 89                            | -41.07 | -9.85  | -0.55 | -18.00 | 17.51 | -30.74 |
| 90                            | -39.96 | -3.41  | -0.43 | -19.44 | 15.85 | -32.38 |
| 91                            | -39.69 | -6.91  | -0.52 | -18.86 | 15.79 | -30.73 |
| 92                            | -32.81 | -0.87  | -0.22 | -17.98 | 15.51 | -31.88 |
| 93                            | -31.07 | 2.28   | -0.35 | -17.32 | 21.46 | -37.15 |
| 94                            | -30.91 | -0.62  | -0.07 | -17.01 | 14.68 | -29.32 |
| 95                            | -29.92 | 1.33   | 0.00  | -14.26 | 12.44 | -29.61 |
| 96                            | -35.21 | -1.84  | -0.25 | -16.81 | 16.38 | -32.79 |
| 97                            | -32.40 | 2.03   | 0.00  | -16.81 | 13.58 | -32.02 |
| 98                            | -30.68 | 3.12   | 0.00  | -16.86 | 13.33 | -29.78 |
| 99                            | -31.04 | 2.82   | -0.01 | -15.29 | 8.62  | -27.58 |
| 100                           | -34.45 | 2.43   | -0.01 | -17.74 | 13.26 | -32.34 |
| <b>Maximum</b>                | -67.66 | -13.22 | -1.33 | -26.95 | 8.62  | -50.92 |
| <b>Minimum</b>                | -29.03 | 3.19   | 0.00  | -14.26 | 23.68 | -27.58 |
| <b>Average</b>                | -45.92 | -3.55  | -0.33 | -20.37 | 16.57 | -37.90 |
| <b>STD (<math>\pm</math>)</b> | 10.89  | 3.91   | 0.30  | 3.46   | 2.67  | 6.65   |
